# Supplementary material
Source: PubMed Central journal article supplement (PMC2000409)
Supplement: pnas_0703476104_1.pdf [file pnas_0703476104_1.pdf]

**Table 2.** Estimates of individual plant mass, mortality and birth rates, half life and ambient temperature for natural populations of photosynthetic organisms. Estimates are provided for species and natural communities of phytoplankton, and species of macroalgae, mosses, ferns, seagrasses, land herbs, salt marsh plants, succulent plants, shrubs, lianas, mangroves and trees. Individual mass was estimated from individual height using published allometric relationships between plant height and mass (1). Phytoplankton mass was estimated from biovolume estimates using published relationships (2). Tree mass (M, in g dry weight) was estimated from diameter at breast height (dbh, in cm) using the regression equation.  $M = 78 \text{ dbh}^{2.47}$ , fitted for a compilation of data encompassing the broadest range of size for the tree flora for tree dbh > 4 cm (Table 3) . The sources of the plant data are provided. See text for sources of temperature data.

| Plant type    | Species (or community)                         | Individual plant mass (gDW) | Mortality rate (d <sup>-1</sup> ) | Half-life (d)        | Birth rate (d <sup>-1</sup> ) | Temperature (K) | Source<br>Plant data |
|---------------|------------------------------------------------|-----------------------------|-----------------------------------|----------------------|-------------------------------|-----------------|----------------------|
| Phytoplankton | Antarctic phytoplanktonic communities          | 2.1x10 <sup>-11</sup>       | 6.8x10 <sup>-3</sup>              | 1.0x10 <sup>2</sup>  |                               | 274             | 3                    |
|               | Antarctic phytoplanktonic communities          | 5.1x10 <sup>-10</sup>       | 1.2x10 <sup>-3</sup>              | 5.8x10 <sup>2</sup>  | 5.3x10 <sup>-1</sup>          | 274             | 3                    |
|               | <i>Dityllum brightwellii</i>                   | 8.3x10 <sup>-8</sup>        | 2.4x10 <sup>-1</sup>              | 2.9x10 <sup>0</sup>  | 5.5x10 <sup>-1</sup>          |                 | 4                    |
|               | <i>Dityllum brightwellii</i>                   | 8.3x10 <sup>-8</sup>        | 6.0x10 <sup>-2</sup>              | 1.2x10 <sup>1</sup>  | 5.3x10 <sup>-1</sup>          |                 | 4                    |
|               | Mediterranean phytoplanktonic community        | 3.8x10 <sup>-12</sup>       | 8.6x10 <sup>-1</sup>              | 8.1x10 <sup>-1</sup> | 1.5x10 <sup>0</sup>           |                 | 5                    |
|               | Mediterranean phytoplanktonic community        | 1.9x10 <sup>-12</sup>       | 4.4x10 <sup>-2</sup>              | 1.6x10 <sup>1</sup>  | 4.0x10 <sup>-1</sup>          |                 | 5                    |
|               | Mediterranean phytoplanktonic community        | 1.0x10 <sup>-13</sup>       | 3.7x10 <sup>-1</sup>              | 1.9x10 <sup>0</sup>  |                               | 292             | 6                    |
|               | Mediterranean phytoplanktonic community        | 5.6x10 <sup>-13</sup>       | 6.4x10 <sup>-1</sup>              | 1.1x10 <sup>0</sup>  |                               | 296             | 6                    |
|               | Mediterranean phytoplanktonic community        | 5.6x10 <sup>-13</sup>       | 5.6x10 <sup>-1</sup>              | 1.2x10 <sup>0</sup>  |                               | 298             | 6                    |
|               | Mediterranean phytoplanktonic community        | 1.1x10 <sup>-12</sup>       | 5.3x10 <sup>-1</sup>              | 1.3x10 <sup>0</sup>  |                               | 290             | 6                    |
|               | <i>Micromonas pusilla</i>                      | 1.9x10 <sup>-12</sup>       | 5.0x10 <sup>-1</sup>              | 1.4x10 <sup>0</sup>  |                               |                 | 7                    |
|               | <i>Phaeocystis pouchetii</i>                   | 5.1x10 <sup>-11</sup>       | 8.0x10 <sup>-1</sup>              | 8.7x10 <sup>-1</sup> |                               |                 | 7                    |
|               | <i>Phaeodactyllum tricornutum</i>              | 1.9x10 <sup>-11</sup>       | 8.0x10 <sup>-3</sup>              | 8.7x10 <sup>1</sup>  | 8.7x10 <sup>-1</sup>          | 291             | 5                    |
|               | <i>Phaeodactyllum tricornutum</i>              | 1.9x10 <sup>-11</sup>       | 1.8x10 <sup>-2</sup>              | 3.9x10 <sup>1</sup>  | 2.0x10 <sup>-1</sup>          | 291             | 5                    |
|               | Tropical NATlantic phytoplanktonic communities | 1.1x10 <sup>-13</sup>       | 1.0x10 <sup>0</sup>               | 6.7x10 <sup>-1</sup> | 2.1x10 <sup>0</sup>           | 297             | 8                    |

**Table 2. (cont).**

| Plant type    | Species (or community)                          | Individual plant mass (gDW) | Mortality rate (d <sup>-1</sup> ) | Half-life (d)        | Birthrate (d <sup>-1</sup> ) | Temperature (K) | Source Plant data |
|---------------|-------------------------------------------------|-----------------------------|-----------------------------------|----------------------|------------------------------|-----------------|-------------------|
| Phytoplankton | Tropical NATlantic phytoplanktonic communities  | 1.6x10 <sup>-12</sup>       | 2.2x10 <sup>-1</sup>              | 3.2x10 <sup>0</sup>  | 5.3x10 <sup>-1</sup>         | 294             | 8                 |
|               | Tropical NATlantic phytoplanktonic communitiess | 4.9x10 <sup>-13</sup>       | 2.5x10 <sup>0</sup>               | 2.8x10 <sup>-1</sup> |                              | 297             | 8                 |
|               | Tropical NATlantic phytoplanktonic communities  | 1.9x10 <sup>-12</sup>       | 3.1x10 <sup>-1</sup>              | 2.2x10 <sup>0</sup>  |                              | 296             | 8                 |
|               | Tropical NATlantic phytoplanktonic communities  | 2.0x10 <sup>-13</sup>       | 8.1x10 <sup>-1</sup>              | 8.6x10 <sup>-1</sup> | 3.0x10 <sup>0</sup>          | 297             | 8                 |
|               | Tropical NATlantic phytoplanktonic communities  | 1.8x10 <sup>-12</sup>       | 1.7x10 <sup>-1</sup>              | 4.1x10 <sup>0</sup>  | 1.3x10 <sup>0</sup>          | 293             | 8                 |
|               | Tropical NATlantic phytoplanktonic communities  | 3.0x10 <sup>-13</sup>       | 1.9x10 <sup>0</sup>               | 3.6x10 <sup>-1</sup> |                              | 298             | 8                 |
|               | Tropical NATlantic phytoplanktonic communities  | 4.7x10 <sup>-12</sup>       | 1.8x10 <sup>-1</sup>              | 3.9x10 <sup>0</sup>  |                              | 293             | 8                 |
|               | Tropical NATlantic phytoplanktonic communities  | 1.8x10 <sup>-12</sup>       | 1.4x10 <sup>-1</sup>              | 5.0x10 <sup>0</sup>  | 3.7x10 <sup>0</sup>          | 295             | 8                 |
|               | Tropical NATlantic phytoplanktonic communities  | 1.2x10 <sup>-12</sup>       | 5.0x10 <sup>-2</sup>              | 1.4x10 <sup>1</sup>  | 3.6x10 <sup>0</sup>          | 294             | 8                 |
|               | Tropical NATlantic phytoplanktonic communities  | 2.5x10 <sup>-12</sup>       | 2.0x10 <sup>-2</sup>              | 3.5x10 <sup>1</sup>  |                              | 295             | 8                 |
|               | Tropical NATlantic phytoplanktonic communities  | 3.4x10 <sup>-11</sup>       | 2.2x10 <sup>-2</sup>              | 3.2x10 <sup>1</sup>  |                              | 295             | 8                 |
|               | Tropical NATlantic phytoplanktonic communities  | 3.2x10 <sup>-12</sup>       | 3.0x10 <sup>-1</sup>              | 2.3x10 <sup>0</sup>  | 1.9x10 <sup>0</sup>          | 298             | 8                 |
|               | Tropical NATlantic phytoplanktonic communities  | 3.2x10 <sup>-10</sup>       | 8.9x10 <sup>-2</sup>              | 7.8x10 <sup>0</sup>  | 4.9x10 <sup>-1</sup>         | 295             | 8                 |
|               | Tropical NATlantic phytoplanktonic communities  | 3.4x10 <sup>-15</sup>       | 6.4x10 <sup>-1</sup>              | 1.1x10 <sup>0</sup>  |                              | 300             | 8                 |
|               | Tropical NATlantic phytoplanktonic communities  | 6.1x10 <sup>-14</sup>       | 1.0x10 <sup>-1</sup>              | 6.9x10 <sup>0</sup>  |                              | 293             | 8                 |
|               | Tropical NATlantic phytoplanktonic communities  | 6.4x10 <sup>-10</sup>       | 5.9x10 <sup>-1</sup>              | 1.2x10 <sup>0</sup>  | 2.9x10 <sup>0</sup>          | 301             | 8                 |
|               | Tropical NATlantic phytoplanktonic communities  | 4.5x10 <sup>-12</sup>       | 1.6x10 <sup>-1</sup>              | 4.3x10 <sup>0</sup>  | 4.0x10 <sup>-2</sup>         | 292             | 8                 |
|               | Tropical NATlantic phytoplanktonic communities  | 2.1x10 <sup>-14</sup>       | 4.3x10 <sup>-1</sup>              | 1.6x10 <sup>0</sup>  |                              | 300             | 8                 |

**Table 2. (cont).**

| Plant type                 | Species (or community)                         | Individual plant mass (gDW) | Mortality rate (d <sup>-1</sup> ) | Half-life (d)        | Birthrate (d <sup>-1</sup> ) | Temperature (K) | Source Plant data |
|----------------------------|------------------------------------------------|-----------------------------|-----------------------------------|----------------------|------------------------------|-----------------|-------------------|
| Phytoplankton              | Tropical NATlantic phytoplanktonic communities | 4.5x10 <sup>-12</sup>       | 9.1x10 <sup>-2</sup>              | 7.6x10 <sup>0</sup>  |                              | 291             | 8                 |
|                            | Tropical NATlantic phytoplanktonic communities | 5.0x10 <sup>-15</sup>       | 4.5x10 <sup>-1</sup>              | 1.5x10 <sup>0</sup>  | 3.7x10 <sup>0</sup>          | 302             | 8                 |
|                            | Tropical NATlantic phytoplanktonic communities | 6.1x10 <sup>-13</sup>       | 5.6x10 <sup>-2</sup>              | 1.2x10 <sup>1</sup>  | 6.8x10 <sup>-1</sup>         | 291             | 8                 |
|                            | Tropical NATlantic phytoplanktonic communities | 4.3x10 <sup>-14</sup>       | 2.6x10 <sup>-1</sup>              | 2.7x10 <sup>0</sup>  | 2.1x10 <sup>0</sup>          | 302             | 8                 |
|                            | Tropical NATlantic phytoplanktonic communities | 2.8x10 <sup>-13</sup>       | 4.0x10 <sup>-2</sup>              | 1.7x10 <sup>1</sup>  | 3.3x10 <sup>-1</sup>         | 291             | 8                 |
|                            | Tropical NATlantic phytoplanktonic communities | 7.8x10 <sup>-15</sup>       | 1.0x10 <sup>0</sup>               | 6.9x10 <sup>-1</sup> |                              | 302             | 8                 |
|                            | Tropical NATlantic phytoplanktonic communities | 1.3x10 <sup>-13</sup>       | 1.0x10 <sup>-2</sup>              | 6.9x10 <sup>1</sup>  |                              | 290             | 8                 |
|                            | Tropical NATlantic phytoplanktonic communities | 7.6x10 <sup>-15</sup>       | 6.2x10 <sup>-1</sup>              | 1.1x10 <sup>0</sup>  |                              | 302             | 8                 |
|                            | Tropical NATlantic phytoplanktonic communities | 3.2x10 <sup>-12</sup>       | 5.7x10 <sup>-2</sup>              | 1.2x10 <sup>1</sup>  | 1.7x10 <sup>0</sup>          | 290             | 8                 |
|                            | Tropical NATlantic phytoplanktonic communities | 7.9x10 <sup>-15</sup>       | 3.7x10 <sup>-1</sup>              | 1.9x10 <sup>0</sup>  |                              | 302             | 8                 |
|                            | Tropical NATlantic phytoplanktonic communities | 1.9x10 <sup>-13</sup>       | 7.1x10 <sup>-2</sup>              | 9.8x10 <sup>0</sup>  |                              | 297             | 8                 |
|                            | Tropical NATlantic phytoplanktonic communities | 3.9x10 <sup>-15</sup>       | 8.0x10 <sup>-1</sup>              | 8.7x10 <sup>-1</sup> | 1.1x10 <sup>0</sup>          | 302             | 8                 |
|                            | Tropical NATlantic phytoplanktonic communities | 3.7x10 <sup>-13</sup>       | 8.7x10 <sup>-2</sup>              | 8.0x10 <sup>0</sup>  | 1.9x10 <sup>-1</sup>         | 293             | 8                 |
|                            | Tropical NATlantic phytoplanktonic communities | 1.3x10 <sup>-14</sup>       | 6.4x10 <sup>-1</sup>              | 1.1x10 <sup>0</sup>  |                              | 302             | 8                 |
|                            | Tropical NATlantic phytoplanktonic communities | 7.3x10 <sup>-13</sup>       | 6.9x10 <sup>-2</sup>              | 1.0x10 <sup>1</sup>  |                              | 293             | 8                 |
|                            | Macroalgae                                     | <i>Ascophyllum nodosum</i>  | 1.7x10 <sup>1</sup>               | 1.3x10 <sup>-3</sup> | 5.2x10 <sup>2</sup>          |                 | 283               |
| <i>Ascophyllum nodosum</i> |                                                | 2.8x10 <sup>1</sup>         | 1.6x10 <sup>-3</sup>              | 4.4x10 <sup>2</sup>  |                              | 283             | 9,10              |
| <i>Ascophyllum nodosum</i> |                                                | 2.3x10 <sup>1</sup>         | 3.4x10 <sup>-4</sup>              | 2.1x10 <sup>3</sup>  |                              | 283             | 9,10              |
| <i>Ascophyllum nodosum</i> |                                                | 4.3x10 <sup>1</sup>         | 1.3x10 <sup>-3</sup>              | 5.2x10 <sup>2</sup>  |                              | 283             | 9,10              |

**Table 2. (cont).**

| Plant type                  | Species (or community)                    | Individual plant mass (gDW) | Mortality rate (d <sup>-1</sup> ) | Half-life (d)       | Birthrate (d <sup>-1</sup> ) | Temperature (K) | Source<br>Plant data |
|-----------------------------|-------------------------------------------|-----------------------------|-----------------------------------|---------------------|------------------------------|-----------------|----------------------|
| Macroalgae                  | <i>Ascophyllum nodosum</i>                | 3.7x10 <sup>1</sup>         | 2.1x10 <sup>-3</sup>              | 3.3x10 <sup>2</sup> |                              | 283             | 9,10                 |
|                             | <i>Ascophyllum nodosum</i>                | 3.6x10 <sup>1</sup>         | 2.2x10 <sup>-4</sup>              | 3.1x10 <sup>3</sup> |                              | 283             | 9,10                 |
|                             | <i>Carpophyllum maschalocarpum</i>        | 4.0x10 <sup>0</sup>         | 4.0x10 <sup>-3</sup>              | 1.7x10 <sup>2</sup> |                              | 291             | 11                   |
|                             | <i>Carpophyllum maschalocarpum</i>        | 1.1x10 <sup>-2</sup>        | 1.1x10 <sup>-3</sup>              | 6.2x10 <sup>2</sup> |                              | 291             | 11                   |
|                             | <i>Carulterpa prolifera</i>               | 5.0x10 <sup>-2</sup>        | 2.4x10 <sup>-3</sup>              | 2.9x10 <sup>2</sup> | 1.5x10 <sup>-2</sup>         | 294             | Marbà<br>unpublished |
|                             | <i>Carulterpa racemosa</i>                | 1.6x10 <sup>-3</sup>        | 5.8x10 <sup>-2</sup>              | 1.2x10 <sup>1</sup> | 3.8x10 <sup>-2</sup>         | 294             | Marbà<br>unpublished |
|                             | <i>Carulterpa taxifolia</i>               | 3.2x10 <sup>-2</sup>        | 7.7x10 <sup>-3</sup>              | 9.0x10 <sup>1</sup> | 1.1x10 <sup>-2</sup>         | 294             | Marbà<br>unpublished |
|                             | <i>Codium bursa</i>                       | 4.2x10 <sup>0</sup>         | 5.6x10 <sup>-3</sup>              | 1.2x10 <sup>2</sup> |                              | 290             | 12                   |
|                             | <i>Codium bursa</i>                       | 4.2x10 <sup>0</sup>         | 2.5x10 <sup>-4</sup>              | 2.8x10 <sup>3</sup> |                              | 290             | 12                   |
|                             | <i>Codium bursa</i>                       | 4.2x10 <sup>0</sup>         | 5.1x10 <sup>-3</sup>              | 1.4x10 <sup>2</sup> |                              | 290             | 12                   |
|                             | <i>Codium fragile ssp. tormentosoides</i> | 7.3x10 <sup>0</sup>         | 7.3x10 <sup>-3</sup>              | 9.5x10 <sup>1</sup> |                              | 288             | 13                   |
|                             | <i>Costaria costaria</i>                  | 3.9x10 <sup>1</sup>         | 2.4x10 <sup>-2</sup>              | 2.9x10 <sup>1</sup> |                              | 284             | 14                   |
|                             | <i>Cystoseira humilis</i>                 | 3.1x10 <sup>-1</sup>        | 4.1x10 <sup>-3</sup>              | 1.7x10 <sup>2</sup> |                              | 291             | 15                   |
|                             | <i>Eisenia arborea</i>                    |                             | 2.2x10 <sup>-3</sup>              | 3.2x10 <sup>2</sup> |                              | 291             | 16                   |
|                             | <i>Fucus distichus</i>                    | 1.3x10 <sup>-2</sup>        | 4.6x10 <sup>-3</sup>              | 1.5x10 <sup>2</sup> |                              | 284             | 17                   |
|                             | <i>Fucus distichus</i>                    | 7.3x10 <sup>-4</sup>        | 8.3x10 <sup>-3</sup>              | 8.3x10 <sup>1</sup> |                              | 284             | 17                   |
|                             | <i>Fucus distichus</i>                    | 6.7x10 <sup>-3</sup>        | 5.8x10 <sup>-3</sup>              | 1.2x10 <sup>2</sup> |                              | 284             | 17                   |
|                             | <i>Fucus distichus</i>                    | 4.0x10 <sup>-2</sup>        | 6.7x10 <sup>-3</sup>              | 1.0x10 <sup>2</sup> |                              | 284             | 17                   |
|                             | <i>Fucus distichus</i>                    | 3.5x10 <sup>-1</sup>        | 3.9x10 <sup>-3</sup>              | 1.8x10 <sup>2</sup> |                              | 284             | 17                   |
|                             | <i>Fucus gardneri</i>                     | 1.2x10 <sup>0</sup>         | 1.8x10 <sup>-3</sup>              | 3.9x10 <sup>2</sup> |                              | 286             | 18                   |
|                             | <i>Fucus gardneri</i>                     | 2.2x10 <sup>-1</sup>        | 1.4x10 <sup>-3</sup>              | 4.9x10 <sup>2</sup> |                              | 286             | 18                   |
|                             | <i>Laminaria longicuris</i>               | 1.5x10 <sup>3</sup>         | 2.9x10 <sup>-3</sup>              | 2.4x10 <sup>2</sup> |                              | 283             | 19                   |
|                             | <i>Laminaria saccharina</i>               | 5.8x10 <sup>0</sup>         | 1.1x10 <sup>-2</sup>              | 6.3x10 <sup>1</sup> |                              | 285             | 20                   |
| <i>Laminaria saccharina</i> | 1.0x10 <sup>1</sup>                       | 9.5x10 <sup>-3</sup>        | 7.3x10 <sup>1</sup>               |                     | 285                          | 20              |                      |
| <i>Laminaria saccharina</i> | 1.2x10 <sup>1</sup>                       | 1.5x10 <sup>-2</sup>        | 4.6x10 <sup>1</sup>               |                     | 285                          | 20              |                      |

**Table 2. (cont).**

| Plant type | Species (or community)           | Individual plant mass (gDW) | Mortality rate (d <sup>-1</sup> ) | Half-life (d)       | Birthrate (d <sup>-1</sup> ) | Temperature (K) | Source<br>Plant data |
|------------|----------------------------------|-----------------------------|-----------------------------------|---------------------|------------------------------|-----------------|----------------------|
| Macroalgae | <i>Leathesia difformis</i>       | 1.4x10 <sup>-2</sup>        | 1.2x10 <sup>-2</sup>              | 5.8x10 <sup>1</sup> |                              | 283             | 21                   |
|            | <i>Nereocystis luetkeana</i>     | 4.2x10 <sup>1</sup>         | 3.6x10 <sup>-2</sup>              | 2.0x10 <sup>1</sup> |                              | 284             | 14                   |
|            | <i>Palmaria palmata</i>          | 6.0x10 <sup>-2</sup>        | 6.4x10 <sup>-3</sup>              | 1.1x10 <sup>2</sup> |                              | 289             | 22                   |
|            | <i>Pelagophycus porra</i>        |                             | 3.7x10 <sup>-3</sup>              | 1.9x10 <sup>2</sup> |                              | 290             | 23                   |
|            | <i>Pelvetia fastigiata</i>       | 6.9x10 <sup>2</sup>         | 3.1x10 <sup>-3</sup>              | 2.3x10 <sup>2</sup> | 2.6x10 <sup>-4</sup>         | 290             | 24                   |
|            | <i>Sargassum sinclairii</i>      | 2.2x10 <sup>1</sup>         | 8.4x10 <sup>-3</sup>              | 8.3x10 <sup>1</sup> |                              | 291             | 11                   |
|            | <i>Sargassum sinclairii</i>      | 3.8x10 <sup>-2</sup>        | 5.7x10 <sup>-3</sup>              | 1.2x10 <sup>2</sup> |                              | 291             | 11                   |
|            | <i>Sargassum spp.</i>            | 3.8x10 <sup>0</sup>         | 7.4x10 <sup>-3</sup>              | 9.4x10 <sup>1</sup> | 7.9x10 <sup>-3</sup>         | 293             | 25                   |
| Mosses     | <i>Drepanocladus exannulatus</i> | 1.6x10 <sup>-2</sup>        | 6.7x10 <sup>-4</sup>              | 1.0x10 <sup>3</sup> |                              | 285             | 26                   |
|            | <i>Drepanocladus exannulatus</i> | 1.9x10 <sup>-2</sup>        | 1.4x10 <sup>-3</sup>              | 4.9x10 <sup>2</sup> |                              | 282             | 26                   |
|            | <i>Drepanocladus exannulatus</i> | 1.8x10 <sup>-2</sup>        | 1.4x10 <sup>-3</sup>              | 5.0x10 <sup>2</sup> |                              | 279             | 26                   |
|            | <i>Sphagnum subsecundum</i>      | 1.7x10 <sup>-2</sup>        | 2.8x10 <sup>-3</sup>              | 2.5x10 <sup>2</sup> |                              | 285             | 26                   |
|            | <i>Sphagnum subsecundum</i>      | 1.6x10 <sup>-2</sup>        | 2.5x10 <sup>-3</sup>              | 2.8x10 <sup>2</sup> |                              | 282             | 26                   |
|            | <i>Sphagnum subsecundum</i>      | 2.8x10 <sup>-2</sup>        | 2.0x10 <sup>-3</sup>              | 3.4x10 <sup>2</sup> |                              | 282             | 26                   |
|            | <i>Sphagnum subsecundum</i>      | 3.3x10 <sup>-2</sup>        | 1.5x10 <sup>-3</sup>              | 4.5x10 <sup>2</sup> |                              | 279             | 26                   |
| Ferns      | <i>Asplenium sphaerosporum</i>   |                             |                                   |                     | 2.8x10 <sup>-4</sup>         | 292             | 27                   |
|            | <i>Pleopeltis crassinervata</i>  |                             | 1.9x10 <sup>-4</sup>              | 3.6x10 <sup>3</sup> | 1.9x10 <sup>-4</sup>         | 292             | 27                   |
|            | <i>Polypodium furfuraceum</i>    |                             | 4.6x10 <sup>-4</sup>              | 1.5x10 <sup>3</sup> | 1.2x10 <sup>-4</sup>         | 292             | 27                   |
|            | <i>Polypodium plesiosorum</i>    |                             | 1.3x10 <sup>-4</sup>              | 5.2x10 <sup>3</sup> | 2.0x10 <sup>-4</sup>         | 292             | 27                   |
| Seagrasses | <i>Amphibolis antarctica</i>     | 3.3x10 <sup>-1</sup>        | 1.6x10 <sup>-3</sup>              | 4.3x10 <sup>2</sup> | 1.7x10 <sup>-3</sup>         | 292             | 28                   |
|            | <i>Amphibolis griffithii</i>     | 6.7x10 <sup>-1</sup>        | 3.0x10 <sup>-3</sup>              | 2.3x10 <sup>2</sup> | 9.4x10 <sup>-4</sup>         | 292             | 28                   |
|            | <i>Cymodocea nodosa</i>          | 3.8x10 <sup>-2</sup>        | 7.4x10 <sup>-3</sup>              | 9.4x10 <sup>1</sup> | 8.0x10 <sup>-3</sup>         | 292             | Duarte unpublished   |
|            | <i>Cymodocea nodosa</i>          | 1.9x10 <sup>-2</sup>        | 2.9x10 <sup>-3</sup>              | 2.4x10 <sup>2</sup> | 1.2x10 <sup>-3</sup>         | 292             | Duarte unpublished   |
|            | <i>Cymodocea nodosa</i>          |                             | 2.4x10 <sup>-3</sup>              | 2.9x10 <sup>2</sup> | 2.4x10 <sup>-3</sup>         | 292             | Duarte unpublished   |
|            | <i>Cymodocea nodosa</i>          |                             | 1.1x10 <sup>-3</sup>              | 6.6x10 <sup>2</sup> | 2.8x10 <sup>-3</sup>         | 292             | Duarte unpublished   |

**Table 2. (cont).**

| Plant type | Species (or community)  | Individual plant mass (gDW) | Mortality rate (d <sup>-1</sup> ) | Half-life (d)         | Birthrate (d <sup>-1</sup> ) | Temperature (K) | Source             |
|------------|-------------------------|-----------------------------|-----------------------------------|-----------------------|------------------------------|-----------------|--------------------|
|            |                         |                             |                                   |                       |                              |                 | Plant data         |
| Seagrasses | <i>Cymodocea nodosa</i> | 1.8x10 <sup>-2</sup>        | 6.9x10 <sup>-3</sup>              | 1.0x10 <sup>2</sup>   | 4.6x10 <sup>-3</sup>         | 292             | Duarte unpublished |
|            | <i>Cymodocea nodosa</i> | 7.0x10 <sup>-3</sup>        | 3.8x10 <sup>-3</sup>              | 1.8x10 <sup>2</sup>   | 3.4x10 <sup>-3</sup>         | 292             | Duarte unpublished |
|            | <i>Cymodocea nodosa</i> | 3.3x10 <sup>-2</sup>        | 2.1x10 <sup>-3</sup>              | 3.2x10 <sup>2</sup>   | 4.9x10 <sup>-3</sup>         | 292             | Duarte unpublished |
|            | <i>Cymodocea nodosa</i> | 1.8x10 <sup>-2</sup>        | 3.4x10 <sup>-3</sup>              | 2.1x10 <sup>2</sup>   | 4.0x10 <sup>-3</sup>         | 292             | Duarte unpublished |
|            | <i>Cymodocea nodosa</i> | 1.1x10 <sup>-2</sup>        | 1.8x10 <sup>-3</sup>              | 3.8x10 <sup>2</sup>   | 1.1x10 <sup>-3</sup>         | 290             | Duarte unpublished |
|            | <i>Cymodocea nodosa</i> | 2.2x10 <sup>-2</sup>        | 1.9x10 <sup>-3</sup>              | 3.6x10 <sup>2</sup>   | 1.4x10 <sup>-3</sup>         | 290             | Duarte unpublished |
|            | <i>Cymodocea nodosa</i> | 3.0x10 <sup>-2</sup>        | 3.3x10 <sup>-3</sup>              | 2.1x10 <sup>2</sup>   | 5.8x10 <sup>-3</sup>         | 293             | Duarte unpublished |
|            | <i>Cymodocea nodosa</i> | 4.9x10 <sup>-2</sup>        | 1.7x10 <sup>-3</sup>              | 4.2x10 <sup>2</sup>   | 1.7x10 <sup>-3</sup>         | 293             | Duarte unpublished |
|            | <i>Cymodocea nodosa</i> | 4.1x10 <sup>-2</sup>        | 3.8x10 <sup>-3</sup>              | 1.8x10 <sup>2</sup>   | 1.9x10 <sup>-3</sup>         | 293             | Duarte unpublished |
|            | <i>Cymodocea nodosa</i> | 2.3x10 <sup>-2</sup>        | 1.0x10 <sup>-3</sup>              | 6.9x10 <sup>2</sup>   | 1.9x10 <sup>-3</sup>         | 292             | Duarte unpublished |
|            | <i>Cymodocea nodosa</i> | 3.0x10 <sup>-2</sup>        | 2.7x10 <sup>-3</sup>              | 2.6x10 <sup>2</sup>   | 3.2x10 <sup>-3</sup>         | 293             | Duarte unpublished |
|            | <i>Cymodocea nodosa</i> | 7.0x10 <sup>-2</sup>        | 3.6x10 <sup>-3</sup>              | 1.9x10 <sup>2</sup>   | 3.0x10 <sup>-3</sup>         | 293             | Duarte unpublished |
|            | <i>Cymodocea nodosa</i> | 5.0x10 <sup>-2</sup>        | 3.4x10 <sup>-3</sup>              | 2.1x10 <sup>+02</sup> | 5.6x10 <sup>-3</sup>         | 293             | Duarte unpublished |
|            | <i>Cymodocea nodosa</i> | 3.0x10 <sup>-2</sup>        | 1.1x10 <sup>-3</sup>              | 6.2x10 <sup>2</sup>   | 3.2x10 <sup>-3</sup>         | 293             | Duarte unpublished |
|            | <i>Cymodocea nodosa</i> | 5.2x10 <sup>-2</sup>        | 1.6x10 <sup>-3</sup>              | 4.5x10 <sup>2</sup>   | 4.4x10 <sup>-3</sup>         | 292             | Duarte unpublished |
|            | <i>Cymodocea nodosa</i> | 4.0x10 <sup>-2</sup>        | 1.9x10 <sup>-3</sup>              | 3.7x10 <sup>2</sup>   | 4.4x10 <sup>-3</sup>         | 293             | Duarte unpublished |
|            | <i>Cymodocea nodosa</i> | 1.3x10 <sup>-1</sup>        | 6.7x10 <sup>-3</sup>              | 1.0x10 <sup>2</sup>   | 8.0x10 <sup>-3</sup>         | 292             | Duarte unpublished |
|            | <i>Cymodocea nodosa</i> | 1.0x10 <sup>-1</sup>        | 4.0x10 <sup>-3</sup>              | 1.7x10 <sup>2</sup>   | 9.3x10 <sup>-3</sup>         | 292             | Duarte unpublished |

**Table 2. (cont).**

| Plant type | Species (or community)         | Individual plant mass (gDW) | Mortality rate (d <sup>-1</sup> ) | Half-life (d)       | Birthrate (d <sup>-1</sup> ) | Temperature (K) | Source             |
|------------|--------------------------------|-----------------------------|-----------------------------------|---------------------|------------------------------|-----------------|--------------------|
|            |                                |                             |                                   |                     |                              |                 | Plant data         |
| Seagrasses | <i>Cymodocea nodosa</i>        | 1.3x10 <sup>-2</sup>        | 6.5x10 <sup>-3</sup>              | 1.1x10 <sup>2</sup> | 6.9x10 <sup>-3</sup>         | 292             | Duarte unpublished |
|            | <i>Cymodocea nodosa</i>        | 1.9x10 <sup>-2</sup>        | 6.4x10 <sup>-3</sup>              | 1.1x10 <sup>2</sup> | 6.4x10 <sup>-3</sup>         | 292             | Duarte unpublished |
|            | <i>Cymodocea nodosa</i>        | 2.2x10 <sup>-2</sup>        | 1.4x10 <sup>-2</sup>              | 4.9x10 <sup>1</sup> |                              | 292             | Duarte unpublished |
|            | <i>Cymodocea nodosa</i>        | 5.3x10 <sup>-2</sup>        | 1.4x10 <sup>-3</sup>              | 4.9x10 <sup>2</sup> | 2.6x10 <sup>-3</sup>         | 292             | Duarte unpublished |
|            | <i>Cymodocea nodosa</i>        | 2.8x10 <sup>-2</sup>        | 2.2x10 <sup>-3</sup>              | 3.2x10 <sup>2</sup> | 2.8x10 <sup>-3</sup>         | 292             | Duarte unpublished |
|            | <i>Cymodocea nodosa</i>        |                             | 5.7x10 <sup>-3</sup>              | 1.2x10 <sup>2</sup> | 4.4x10 <sup>-3</sup>         | 290             | Duarte unpublished |
|            | <i>Cymodocea nodosa</i>        | 1.8x10 <sup>-1</sup>        | 3.8x10 <sup>-3</sup>              | 1.8x10 <sup>2</sup> | 3.6x10 <sup>-4</sup>         | 290             | 29                 |
|            | <i>Cymodocea nodosa</i>        | 2.9x10 <sup>-1</sup>        | 1.0x10 <sup>-2</sup>              | 6.7x10 <sup>1</sup> | 6.5x10 <sup>-3</sup>         | 290             | 29                 |
|            | <i>Cymodocea nodosa</i>        | 1.3x10 <sup>-1</sup>        | 3.3x10 <sup>-3</sup>              | 2.1x10 <sup>2</sup> | 7.5x10 <sup>-4</sup>         | 290             | 29                 |
|            | <i>Cymodocea nodosa</i>        | 3.2x10 <sup>-1</sup>        | 2.8x10 <sup>-3</sup>              | 2.5x10 <sup>2</sup> | 3.9x10 <sup>-4</sup>         | 290             | 29                 |
|            | <i>Cymodocea nodosa</i>        | 2.7x10 <sup>-1</sup>        | 2.9x10 <sup>-3</sup>              | 2.4x10 <sup>2</sup> | 8.1x10 <sup>-4</sup>         | 290             | 29                 |
|            | <i>Cymodocea nodosa</i>        | 2.5x10 <sup>-1</sup>        | 4.5x10 <sup>-3</sup>              | 1.5x10 <sup>2</sup> | 2.4x10 <sup>-3</sup>         | 293             | 30                 |
|            | <i>Cymodocea nodosa</i>        | 2.0x10 <sup>-1</sup>        | 2.4x10 <sup>-3</sup>              | 2.9x10 <sup>2</sup> | 2.3x10 <sup>-3</sup>         | 293             | 30                 |
|            | <i>Cymodocea nodosa</i>        | 1.3x10 <sup>-1</sup>        | 2.6x10 <sup>-3</sup>              | 2.7x10 <sup>2</sup> | 2.2x10 <sup>-3</sup>         | 293             | 30                 |
|            | <i>Cymodocea nodosa</i>        | 1.3x10 <sup>-1</sup>        | 8.5x10 <sup>-3</sup>              | 8.2x10 <sup>1</sup> | 3.7x10 <sup>-3</sup>         | 295             | 31                 |
|            | <i>Cymodocea nodosa</i>        |                             | 9.9x10 <sup>-4</sup>              | 7.0x10 <sup>2</sup> | 2.9x10 <sup>-4</sup>         | 290             | Marbà unpublished  |
|            | <i>Cymodocea nodosa</i>        |                             | 9.3x10 <sup>-4</sup>              | 7.4x10 <sup>2</sup> | 7.8x10 <sup>-4</sup>         | 290             | Marbà unpublished  |
|            | <i>Cymodocea rotundata</i>     | 1.2x10 <sup>-1</sup>        | 2.2x10 <sup>-3</sup>              | 3.1x10 <sup>2</sup> | 3.0x10 <sup>-3</sup>         | 301             | 32,33              |
|            | <i>Cymodocea serrulata</i>     | 1.5x10 <sup>-1</sup>        | 7.9x10 <sup>-3</sup>              | 8.7x10 <sup>1</sup> | 8.6x10 <sup>-3</sup>         | 301             | 32                 |
|            | <i>Enhalus acoroides</i>       | 2.5x10 <sup>0</sup>         | 6.4x10 <sup>-4</sup>              | 1.1x10 <sup>3</sup> | 7.2x10 <sup>-4</sup>         | 301             | 32                 |
|            | <i>Heterozostera tasmanica</i> | 5.0x10 <sup>-2</sup>        | 1.0x10 <sup>-2</sup>              | 6.7x10 <sup>1</sup> | 2.6x10 <sup>-3</sup>         | 292             | 29                 |
|            | <i>Halodule uninervis</i>      | 5.0x10 <sup>-2</sup>        | 5.0x10 <sup>-3</sup>              | 1.4x10 <sup>2</sup> | 5.7x10 <sup>-3</sup>         | 301             | 32                 |
|            | <i>Halodule wrightii</i>       | 3.0x10 <sup>-2</sup>        | 9.8x10 <sup>-3</sup>              | 7.0x10 <sup>1</sup> | 1.2x10 <sup>-2</sup>         |                 | 34                 |
|            | <i>Posidonia angustifolia</i>  | 3.7x10 <sup>-1</sup>        | 3.4x10 <sup>-3</sup>              | 2.0x10 <sup>2</sup> | 2.1x10 <sup>-3</sup>         | 292             | 28                 |
|            | <i>Posidonia australis</i>     | 4.0x10 <sup>-1</sup>        | 1.0x10 <sup>-3</sup>              | 6.7x10 <sup>2</sup> | 1.3x10 <sup>-3</sup>         | 292             | 28                 |

**Table 2. (cont).**

| Plant type                | Species (or community)    | Individual plant mass (gDW) | Mortality rate (d <sup>-1</sup> ) | Half-life (d)        | Birthrate (d <sup>-1</sup> ) | Temperature (K) | Source<br>Plant data |
|---------------------------|---------------------------|-----------------------------|-----------------------------------|----------------------|------------------------------|-----------------|----------------------|
| Seagrasses                | <i>Posidonia oceanica</i> | 4.5x10 <sup>-1</sup>        | 5.0x10 <sup>-4</sup>              | 1.4x10 <sup>3</sup>  | 8.3x10 <sup>-5</sup>         | 292             | 35                   |
|                           | <i>Posidonia oceanica</i> | 9.4x10 <sup>-1</sup>        | 2.2x10 <sup>-4</sup>              | 3.1x10 <sup>3</sup>  | 3.1x10 <sup>-4</sup>         | 292             | 35                   |
|                           | <i>Posidonia oceanica</i> | 5.8x10 <sup>-1</sup>        | 1.5x10 <sup>-3</sup>              | 4.7x10 <sup>2</sup>  | 1.4x10 <sup>-4</sup>         | 292             | 35                   |
|                           | <i>Posidonia oceanica</i> | 2.2x10 <sup>-1</sup>        | 5.6x10 <sup>-4</sup>              | 1.2x10 <sup>3</sup>  |                              | 292             | 35                   |
|                           | <i>Posidonia oceanica</i> | 5.2x10 <sup>-1</sup>        | 1.3x10 <sup>-3</sup>              | 5.5x10 <sup>2</sup>  | 4.4x10 <sup>-4</sup>         | 290             | 35                   |
|                           | <i>Posidonia oceanica</i> | 5.1x10 <sup>-1</sup>        | 6.7x10 <sup>-4</sup>              | 1.0x10 <sup>3</sup>  | 3.3x10 <sup>-4</sup>         | 292             | 35                   |
|                           | <i>Posidonia oceanica</i> | 8.0x10 <sup>-1</sup>        | 2.2x10 <sup>-4</sup>              | 3.1x10 <sup>3</sup>  | 4.4x10 <sup>-4</sup>         | 292             | 35                   |
|                           | <i>Posidonia oceanica</i> | 2.9x10 <sup>-1</sup>        | 4.2x10 <sup>-4</sup>              | 1.7x10 <sup>3</sup>  | 2.8x10 <sup>-4</sup>         | 292             | 35                   |
|                           | <i>Posidonia oceanica</i> | 1.3x10 <sup>0</sup>         | 1.7x10 <sup>-4</sup>              | 4.2x10 <sup>3</sup>  | 3.6x10 <sup>-4</sup>         | 292             | 35                   |
|                           | <i>Posidonia oceanica</i> | 6.3x10 <sup>-1</sup>        | 6.4x10 <sup>-4</sup>              | 1.1x10 <sup>3</sup>  | 3.6x10 <sup>-4</sup>         | 290             | 35                   |
|                           | <i>Posidonia oceanica</i> | 5.5x10 <sup>-1</sup>        | 1.9x10 <sup>-4</sup>              | 3.6x10 <sup>3</sup>  | 4.4x10 <sup>-4</sup>         | 292             | 35                   |
|                           | <i>Posidonia oceanica</i> | 6.3x10 <sup>-1</sup>        | 4.4x10 <sup>-4</sup>              | 1.6x10 <sup>3</sup>  |                              | 292             | 35                   |
|                           | <i>Posidonia oceanica</i> |                             | 1.0x10 <sup>-3</sup>              | 7.0x10 <sup>2</sup>  | 2.0x10 <sup>-4</sup>         | 290             | 36                   |
|                           | <i>Posidonia oceanica</i> | 5.7x10 <sup>-1</sup>        |                                   |                      | 2.5x10 <sup>-4</sup>         | 290             | 35                   |
|                           | <i>Posidonia oceanica</i> | 5.6x10 <sup>-1</sup>        | 1.9x10 <sup>-4</sup>              | 3.6x10 <sup>3</sup>  | 2.8x10 <sup>-4</sup>         | 290             | 35                   |
|                           | <i>Posidonia oceanica</i> | 1.9x10 <sup>-1</sup>        | 4.7x10 <sup>-4</sup>              | 1.5x10 <sup>3</sup>  | 2.5x10 <sup>-4</sup>         | 292             | 35                   |
|                           | <i>Posidonia oceanica</i> | 1.3x10 <sup>0</sup>         | 1.7x10 <sup>-4</sup>              | 4.2x10 <sup>3</sup>  | 8.3x10 <sup>-5</sup>         | 290             | 35                   |
|                           | <i>Posidonia oceanica</i> | 5.8x10 <sup>-1</sup>        | 2.2x10 <sup>-4</sup>              | 3.1x10 <sup>3</sup>  | 8.3x10 <sup>-5</sup>         | 290             | 35                   |
|                           | <i>Posidonia oceanica</i> | 7.2x10 <sup>-1</sup>        | 1.9x10 <sup>-4</sup>              | 3.6x10 <sup>3</sup>  | 5.6x10 <sup>-5</sup>         | 292             | 35                   |
|                           | <i>Posidonia oceanica</i> | 8.2x10 <sup>-1</sup>        | 9.2x10 <sup>-4</sup>              | 7.6x10 <sup>2</sup>  |                              | 292             | 35                   |
|                           | <i>Posidonia oceanica</i> | 6.8x10 <sup>-1</sup>        | 5.0x10 <sup>-4</sup>              | 1.4x10 <sup>3</sup>  | 1.1x10 <sup>-4</sup>         | 290             | 35                   |
|                           | <i>Posidonia oceanica</i> | 4.9x10 <sup>-1</sup>        | 1.3x10 <sup>-3</sup>              | 5.2x10 <sup>2</sup>  | 1.2x10 <sup>-3</sup>         | 292             | 35                   |
|                           | <i>Posidonia oceanica</i> | 1.3x10 <sup>0</sup>         | 7.5x10 <sup>-4</sup>              | 9.2x10 <sup>2</sup>  |                              | 292             | 35                   |
|                           | <i>Posidonia oceanica</i> | 7.3x10 <sup>-1</sup>        | 7.2x10 <sup>-4</sup>              | 9.6x10 <sup>2</sup>  | 2.8x10 <sup>-4</sup>         | 292             | 35                   |
|                           | <i>Posidonia oceanica</i> | 3.2x10 <sup>-1</sup>        | 5.0x10 <sup>-4</sup>              | 1.4x10 <sup>3</sup>  | 2.8x10 <sup>-4</sup>         | 292             | 35                   |
|                           | <i>Posidonia oceanica</i> | 6.5x10 <sup>-1</sup>        | 2.2x10 <sup>-4</sup>              | 3.1x10 <sup>3</sup>  | 2.8x10 <sup>-4</sup>         | 290             | 35                   |
| <i>Posidonia oceanica</i> | 4.1x10 <sup>-1</sup>      | 5.0x10 <sup>-4</sup>        | 1.4x10 <sup>3</sup>               | 1.9x10 <sup>-4</sup> | 290                          | 35              |                      |



**Table 2. (cont).**

| Plant type | Species (or community)    | Individual plant mass (gDW) | Mortality rate (d <sup>-1</sup> ) | Half-life (d)       | Birthrate (d <sup>-1</sup> ) | Temperature (K) | Source<br>Plant data |
|------------|---------------------------|-----------------------------|-----------------------------------|---------------------|------------------------------|-----------------|----------------------|
| Seagrasses | <i>Posidonia oceanica</i> | 1.3x10 <sup>0</sup>         | 7.2x10 <sup>-4</sup>              | 9.6x10 <sup>2</sup> | 8.3x10 <sup>-5</sup>         | 292             | 35                   |
|            | <i>Posidonia oceanica</i> | 2.8x10 <sup>-1</sup>        | 1.3x10 <sup>-3</sup>              | 5.5x10 <sup>2</sup> | 1.1x10 <sup>-3</sup>         | 292             | 35                   |
|            | <i>Posidonia oceanica</i> |                             | 2.6x10 <sup>-4</sup>              | 2.6x10 <sup>3</sup> | 3.1x10 <sup>-4</sup>         | 293             | 37                   |
|            | <i>Posidonia oceanica</i> |                             | 1.8x10 <sup>-4</sup>              | 3.8x10 <sup>3</sup> | 4.7x10 <sup>-4</sup>         | 293             | 38                   |
|            | <i>Posidonia oceanica</i> |                             | 1.2x10 <sup>-4</sup>              | 5.8x10 <sup>3</sup> | 3.4x10 <sup>-4</sup>         | 293             | 38                   |
|            | <i>Posidonia oceanica</i> |                             | 3.1x10 <sup>-4</sup>              | 2.2x10 <sup>3</sup> | 5.2x10 <sup>-5</sup>         | 293             | 38                   |
|            | <i>Posidonia oceanica</i> |                             | 4.3x10 <sup>-4</sup>              | 1.6x10 <sup>3</sup> | 3.9x10 <sup>-5</sup>         | 293             | 38                   |
|            | <i>Posidonia oceanica</i> |                             | 9.2x10 <sup>-4</sup>              | 7.5x10 <sup>2</sup> | 1.2x10 <sup>-4</sup>         | 293             | 38                   |
|            | <i>Posidonia oceanica</i> |                             | 3.4x10 <sup>-4</sup>              | 2.0x10 <sup>3</sup> | 4.1x10 <sup>-4</sup>         | 293             | 38                   |
|            | <i>Posidonia oceanica</i> |                             | 1.3x10 <sup>-4</sup>              | 5.3x10 <sup>3</sup> | 8.5x10 <sup>-5</sup>         | 293             | 38                   |
|            | <i>Posidonia oceanica</i> |                             | 2.8x10 <sup>-4</sup>              | 2.5x10 <sup>3</sup> |                              | 293             | 38                   |
|            | <i>Posidonia oceanica</i> |                             | 1.5x10 <sup>-4</sup>              | 4.6x10 <sup>3</sup> | 5.4x10 <sup>-5</sup>         | 293             | 38                   |
|            | <i>Posidonia oceanica</i> |                             | 9.4x10 <sup>-5</sup>              | 7.3x10 <sup>3</sup> | 1.1x10 <sup>-4</sup>         | 293             | 38                   |
|            | <i>Posidonia oceanica</i> |                             | 3.0x10 <sup>-4</sup>              | 2.3x10 <sup>3</sup> |                              | 293             | 38                   |
|            | <i>Posidonia oceanica</i> |                             | 2.7x10 <sup>-4</sup>              | 2.6x10 <sup>3</sup> | 2.5x10 <sup>-4</sup>         | 293             | 37                   |
|            | <i>Posidonia oceanica</i> |                             | 6.4x10 <sup>-4</sup>              | 1.1x10 <sup>3</sup> | 3.5x10 <sup>-4</sup>         | 293             | 37                   |
|            | <i>Posidonia oceanica</i> |                             | 4.5x10 <sup>-4</sup>              | 1.6x10 <sup>3</sup> | 7.7x10 <sup>-4</sup>         | 293             | 37                   |
|            | <i>Posidonia oceanica</i> |                             | 3.1x10 <sup>-4</sup>              | 2.3x10 <sup>3</sup> | 1.1x10 <sup>-4</sup>         | 293             | 38                   |

**Table 2. (cont).**

| Plant type                | Species (or community)    | Individual plant mass (gDW) | Mortality rate (d <sup>-1</sup> ) | Half-life (d)        | Birthrate (d <sup>-1</sup> ) | Temperature (K) | Source<br>Plant data |
|---------------------------|---------------------------|-----------------------------|-----------------------------------|----------------------|------------------------------|-----------------|----------------------|
| Seagrasses                | <i>Posidonia oceanica</i> |                             | 5.3x10 <sup>-4</sup>              | 1.3x10 <sup>3</sup>  | 8.3x10 <sup>-5</sup>         | 293             | 36                   |
|                           | <i>Posidonia oceanica</i> |                             | 6.1x10 <sup>-4</sup>              | 1.1x10 <sup>3</sup>  | 1.1x10 <sup>-4</sup>         | 293             | 36                   |
|                           | <i>Posidonia oceanica</i> |                             | 1.1x10 <sup>-4</sup>              | 6.2x10 <sup>3</sup>  | 1.1x10 <sup>-4</sup>         | 293             | 36                   |
|                           | <i>Posidonia oceanica</i> |                             | 8.3x10 <sup>-5</sup>              | 8.3x10 <sup>3</sup>  | 8.3x10 <sup>-5</sup>         | 293             | 36                   |
|                           | <i>Posidonia oceanica</i> |                             | 5.8x10 <sup>-4</sup>              | 1.2x10 <sup>3</sup>  | 5.6x10 <sup>-5</sup>         | 293             | 36                   |
|                           | <i>Posidonia oceanica</i> |                             | 5.0x10 <sup>-4</sup>              | 1.4x10 <sup>3</sup>  | 8.3x10 <sup>-5</sup>         | 293             | 36                   |
|                           | <i>Posidonia oceanica</i> |                             | 3.9x10 <sup>-4</sup>              | 1.8x10 <sup>3</sup>  | 1.4x10 <sup>-4</sup>         | 293             | 36                   |
|                           | <i>Posidonia oceanica</i> |                             | 7.8x10 <sup>-4</sup>              | 8.9x10 <sup>2</sup>  | 1.4x10 <sup>-4</sup>         | 293             | 36                   |
|                           | <i>Posidonia oceanica</i> |                             | 4.7x10 <sup>-4</sup>              | 1.5x10 <sup>3</sup>  | 1.7x10 <sup>-4</sup>         | 293             | 36                   |
|                           | <i>Posidonia oceanica</i> |                             | 3.3x10 <sup>-4</sup>              | 2.1x10 <sup>3</sup>  | 1.9x10 <sup>-4</sup>         | 293             | 36                   |
|                           | <i>Posidonia oceanica</i> |                             | 3.3x10 <sup>-4</sup>              | 2.1x10 <sup>3</sup>  | 1.1x10 <sup>-4</sup>         | 293             | 36                   |
|                           | <i>Posidonia oceanica</i> |                             | 3.1x10 <sup>-4</sup>              | 2.3x10 <sup>3</sup>  | 1.1x10 <sup>-4</sup>         | 293             | 36                   |
|                           | <i>Posidonia oceanica</i> |                             | 6.7x10 <sup>-4</sup>              | 1.0x10 <sup>3</sup>  | 8.3x10 <sup>-5</sup>         | 292             | 36                   |
|                           | <i>Posidonia oceanica</i> |                             | 6.7x10 <sup>-4</sup>              | 1.0x10 <sup>3</sup>  | 4.2x10 <sup>-4</sup>         | 292             | 36                   |
|                           | <i>Posidonia oceanica</i> |                             | 7.8x10 <sup>-4</sup>              | 8.9x10 <sup>2</sup>  | 1.7x10 <sup>-4</sup>         | 292             | 36                   |
|                           | <i>Posidonia oceanica</i> |                             | 4.4x10 <sup>-4</sup>              | 1.6x10 <sup>3</sup>  | 8.3x10 <sup>-4</sup>         | 292             | 36                   |
|                           | <i>Posidonia oceanica</i> |                             | 5.8x10 <sup>-4</sup>              | 1.2x10 <sup>3</sup>  | 1.4x10 <sup>-4</sup>         | 292             | 36                   |
|                           | <i>Posidonia oceanica</i> |                             | 3.9x10 <sup>-4</sup>              | 1.8x10 <sup>3</sup>  | 5.6x10 <sup>-5</sup>         | 290             | 36                   |
|                           | <i>Posidonia oceanica</i> |                             | 4.7x10 <sup>-4</sup>              | 1.5x10 <sup>3</sup>  | 2.5x10 <sup>-4</sup>         | 290             | 36                   |
|                           | <i>Posidonia oceanica</i> |                             | 7.8x10 <sup>-4</sup>              | 8.9x10 <sup>2</sup>  | 1.9x10 <sup>-4</sup>         | 290             | 36                   |
| <i>Posidonia oceanica</i> |                           | 6.4x10 <sup>-4</sup>        | 1.1x10 <sup>3</sup>               | 5.0x10 <sup>-4</sup> | 290                          | 36              |                      |

**Table 2. (cont).**

| Plant type | Species (or community)          | Individual plant mass (gDW) | Mortality rate (d <sup>-1</sup> ) | Half-life (d)       | Birthrate (d <sup>-1</sup> ) | Temperature (K) | Source<br>Plant data |
|------------|---------------------------------|-----------------------------|-----------------------------------|---------------------|------------------------------|-----------------|----------------------|
| Seagrasses | <i>Posidonia oceanica</i>       |                             | 3.3x10 <sup>-4</sup>              | 2.1x10 <sup>3</sup> | 8.3x10 <sup>-5</sup>         | 293             | 36                   |
|            | <i>Posidonia oceanica</i>       |                             | 1.1x10 <sup>-4</sup>              | 6.2x10 <sup>3</sup> | 5.6x10 <sup>-5</sup>         | 293             | 36                   |
|            | <i>Posidonia oceanica</i>       |                             | 5.6x10 <sup>-5</sup>              | 1.2x10 <sup>4</sup> | 8.3x10 <sup>-5</sup>         | 293             | 36                   |
|            | <i>Posidonia oceanica</i>       | 2.7x10 <sup>-1</sup>        | 2.8x10 <sup>-4</sup>              | 2.5x10 <sup>3</sup> |                              |                 | 39                   |
|            | <i>Posidonia oceanica</i>       |                             | 4.5x10 <sup>-4</sup>              | 1.5x10 <sup>3</sup> |                              |                 | 40                   |
|            | <i>Posidonia oceanica</i>       |                             | 2.0x10 <sup>-2</sup>              | 3.4x10 <sup>1</sup> |                              |                 | 40                   |
|            | <i>Posidonia oceanica</i>       |                             | 8.9x10 <sup>-4</sup>              | 7.8x10 <sup>2</sup> |                              |                 | 40                   |
|            | <i>Posidonia oceanica</i>       |                             | 1.1x10 <sup>-3</sup>              | 6.3x10 <sup>2</sup> |                              |                 | 40                   |
|            | <i>Posidonia oceanica</i>       |                             | 4.1x10 <sup>-2</sup>              | 1.7x10 <sup>1</sup> |                              |                 | 40                   |
|            | <i>Posidonia oceanica</i>       |                             | 9.0x10 <sup>-3</sup>              | 7.7x10 <sup>1</sup> |                              |                 | 40                   |
|            | <i>Posidonia sinuosa</i>        | 3.0x10 <sup>-1</sup>        | 1.3x10 <sup>-3</sup>              | 5.5x10 <sup>2</sup> | 9.2x10 <sup>-4</sup>         | 290             | 28                   |
|            | <i>Posidonia sinuosa</i>        | 2.3x10 <sup>-1</sup>        | 1.4x10 <sup>-3</sup>              | 5.0x10 <sup>2</sup> | 5.0x10 <sup>-4</sup>         | 292             | 28                   |
|            | <i>Syringodium filiforme</i>    | 6.0x10 <sup>-2</sup>        | 5.7x10 <sup>-3</sup>              | 1.2x10 <sup>2</sup> | 2.1x10 <sup>-3</sup>         | 299             | 34                   |
|            | <i>Syringodium isoetifolium</i> | 9.0x10 <sup>-2</sup>        | 6.8x10 <sup>-3</sup>              | 1.0x10 <sup>2</sup> | 5.7x10 <sup>-3</sup>         | 301             | 32                   |
|            | <i>Syringodium filiforme</i>    | 1.9x10 <sup>-1</sup>        | 3.2x10 <sup>-3</sup>              | 2.2x10 <sup>2</sup> |                              | 300             | 41                   |
|            | <i>Thalassodendron ciliatum</i> | 4.4x10 <sup>-1</sup>        | 2.0x10 <sup>-3</sup>              | 3.5x10 <sup>2</sup> | 1.8x10 <sup>-3</sup>         | 299             | 42                   |
|            | <i>Thalassodendron ciliatum</i> |                             | 2.0x10 <sup>-3</sup>              | 3.5x10 <sup>2</sup> | 3.8x10 <sup>-3</sup>         | 299             | 43                   |
|            | <i>Thalassodendron ciliatum</i> |                             | 8.6x10 <sup>-4</sup>              | 8.0x10 <sup>2</sup> | 1.2x10 <sup>-3</sup>         | 299             | 43                   |
|            | <i>Thalassodendron ciliatum</i> |                             | 1.9x10 <sup>-3</sup>              | 3.7x10 <sup>2</sup> | 3.1x10 <sup>-3</sup>         | 299             | 43                   |
|            | <i>Thalassodendron ciliatum</i> |                             | 1.8x10 <sup>-3</sup>              | 3.8x10 <sup>2</sup> | 3.1x10 <sup>-3</sup>         | 299             | 43                   |
|            | <i>Thalassodendron ciliatum</i> |                             | 2.2x10 <sup>-3</sup>              | 3.2x10 <sup>2</sup> | 5.4x10 <sup>-3</sup>         | 299             | 43                   |
|            | <i>Thalassodendron ciliatum</i> |                             | 2.7x10 <sup>-3</sup>              | 2.5x10 <sup>2</sup> | 2.7x10 <sup>-3</sup>         | 298             | 43                   |
|            | <i>Thalassodendron ciliatum</i> |                             | 1.3x10 <sup>-3</sup>              | 5.4x10 <sup>2</sup> | 1.3x10 <sup>-3</sup>         | 298             | 43                   |
|            | <i>Thalassodendron ciliatum</i> |                             | 1.7x10 <sup>-3</sup>              | 4.1x10 <sup>2</sup> | 2.5x10 <sup>-3</sup>         | 298             | 43                   |
|            | <i>Thalassodendron ciliatum</i> |                             | 2.2x10 <sup>-3</sup>              | 3.2x10 <sup>2</sup> | 2.1x10 <sup>-3</sup>         | 298             | 43                   |

**Table 2. (cont).**

| Plant type                   | Species (or community)             | Individual plant mass (gDW)        | Mortality rate (d <sup>-1</sup> ) | Half-life (d)        | Birthrate (d <sup>-1</sup> ) | Temperature (K) | Source<br>Plant data |    |
|------------------------------|------------------------------------|------------------------------------|-----------------------------------|----------------------|------------------------------|-----------------|----------------------|----|
| Seagrasses                   | <i>Thalassodendron ciliatum</i>    |                                    | 2.1×10 <sup>-3</sup>              | 3.3×10 <sup>2</sup>  | 4.2×10 <sup>-3</sup>         | 299             | 43                   |    |
|                              | <i>Thalassodendron ciliatum</i>    |                                    | 1.7×10 <sup>-3</sup>              | 4.0×10 <sup>2</sup>  | 3.3×10 <sup>-3</sup>         | 298             | 43                   |    |
|                              | <i>Thalassia hemprichii</i>        | 2.6×10 <sup>-1</sup>               | 1.3×10 <sup>-3</sup>              | 5.2×10 <sup>2</sup>  | 2.1×10 <sup>-3</sup>         | 301             | 32,33                |    |
|                              | <i>Thalassodendron pachyrrizum</i> | 5.8×10 <sup>-1</sup>               | 1.2×10 <sup>-3</sup>              | 5.8×10 <sup>2</sup>  | 7.2×10 <sup>-4</sup>         | 290             | 28                   |    |
|                              | <i>Thalassia testudinum</i>        | 4.4×10 <sup>-1</sup>               | 3.8×10 <sup>-3</sup>              | 1.8×10 <sup>2</sup>  | 1.3×10 <sup>-3</sup>         | 299             | 44,45                |    |
|                              | <i>Thalassia testudinum</i>        | 4.6×10 <sup>-1</sup>               | 2.8×10 <sup>-3</sup>              | 2.5×10 <sup>2</sup>  | 1.4×10 <sup>-3</sup>         | 299             | 44,45                |    |
|                              | <i>Thalassia testudinum</i>        | 5.7×10 <sup>-1</sup>               | 2.4×10 <sup>-3</sup>              | 2.9×10 <sup>2</sup>  | 4.1×10 <sup>-3</sup>         | 299             | 44,45                |    |
|                              | <i>Zostera marina</i>              | 2.6×10 <sup>-1</sup>               | 2.5×10 <sup>-3</sup>              | 2.8×10 <sup>2</sup>  | 1.8×10 <sup>-3</sup>         | 286             | 46                   |    |
|                              | <i>Zostera marina</i>              | 5.1×10 <sup>-1</sup>               | 4.2×10 <sup>-3</sup>              | 1.7×10 <sup>2</sup>  | 3.3×10 <sup>-3</sup>         | 289             | 47                   |    |
|                              | <i>Zostera marina</i>              | 2.4×10 <sup>-1</sup>               | 6.0×10 <sup>-3</sup>              | 1.2×10 <sup>2</sup>  | 2.4×10 <sup>-3</sup>         | 289             | 47                   |    |
|                              | <i>Zostera noltii</i>              | 1.0×10 <sup>-1</sup>               | 9.3×10 <sup>-3</sup>              | 7.4×10 <sup>1</sup>  | 5.5×10 <sup>-3</sup>         | 289             | 47                   |    |
|                              | <i>Zostera noltii</i>              | 5.1×10 <sup>-2</sup>               | 1.0×10 <sup>-2</sup>              | 6.9×10 <sup>1</sup>  | 9.3×10 <sup>-3</sup>         | 289             | 47                   |    |
|                              | Land herbs and salt marsh plants   | <i>L cylindracea and L spicata</i> |                                   | 1.6×10 <sup>-4</sup> | 4.3×10 <sup>3</sup>          |                 | 283                  | 48 |
|                              |                                    | <i>Agropyron spicatum</i>          |                                   | 1.4×10 <sup>-5</sup> | 5.0×10 <sup>4</sup>          |                 | 290                  | 49 |
| <i>Agropyron spicatum</i>    |                                    |                                    | 1.9×10 <sup>-3</sup>              | 3.7×10 <sup>2</sup>  |                              | 280             | 50                   |    |
| <i>Agropyron spicatum</i>    |                                    |                                    | 1.8×10 <sup>-3</sup>              | 3.8×10 <sup>2</sup>  |                              | 280             | 50                   |    |
| <i>Allium tricoccum</i>      |                                    | 1.3×10 <sup>0</sup>                | 2.5×10 <sup>-4</sup>              | 2.8×10 <sup>3</sup>  | 8.6×10 <sup>-4</sup>         | 277             | 51                   |    |
| <i>Allium tricoccum</i>      |                                    | 1.5×10 <sup>0</sup>                | 6.0×10 <sup>-4</sup>              | 1.2×10 <sup>3</sup>  | 1.2×10 <sup>-4</sup>         | 277             | 51                   |    |
| <i>Allium tricoccum</i>      |                                    | 1.1×10 <sup>0</sup>                | 3.6×10 <sup>-4</sup>              | 1.9×10 <sup>3</sup>  | 3.8×10 <sup>-4</sup>         | 277             | 51                   |    |
| <i>Allium tricoccum</i>      |                                    | 1.4×10 <sup>0</sup>                | 9.2×10 <sup>-4</sup>              | 7.5×10 <sup>2</sup>  | 2.1×10 <sup>-4</sup>         | 277             | 51                   |    |
| <i>Ambrosia trifida</i>      |                                    |                                    | 3.8×10 <sup>-2</sup>              | 1.8×10 <sup>1</sup>  |                              | 283             | 52                   |    |
| <i>Anthoxanthum odoratum</i> |                                    |                                    | 8.3×10 <sup>-4</sup>              | 7.1×10 <sup>2</sup>  | 1.7×10 <sup>-3</sup>         | 282             | 53                   |    |
| <i>Anthyllis vulneraria</i>  |                                    |                                    | 1.9×10 <sup>-3</sup>              | 3.7×10 <sup>2</sup>  |                              |                 | 54                   |    |
| <i>Anthyllis vulneraria</i>  |                                    |                                    | 1.4×10 <sup>-3</sup>              | 4.8×10 <sup>2</sup>  |                              |                 | 54                   |    |
| <i>Arisaema triphyllum</i>   |                                    | 1.2×10 <sup>-1</sup>               | 1.3×10 <sup>-2</sup>              | 5.5×10 <sup>1</sup>  |                              | 281             | 55                   |    |
| <i>Arisaema triphyllum</i>   |                                    | 2.2×10 <sup>-1</sup>               | 9.0×10 <sup>-4</sup>              | 7.7×10 <sup>2</sup>  |                              | 281             | 55                   |    |

**Table 2. (cont).**

| Plant type                       | Species (or community)          | Individual plant mass (gDW) | Mortality rate (d <sup>-1</sup> ) | Half-life (d)        | Birthrate (d <sup>-1</sup> ) | Temperature (K) | Source<br>Plant data |    |
|----------------------------------|---------------------------------|-----------------------------|-----------------------------------|----------------------|------------------------------|-----------------|----------------------|----|
| Land herbs and salt marsh plants | <i>Arisaema triphyllum</i>      | 2.4x10 <sup>-1</sup>        | 1.1x10 <sup>-3</sup>              | 6.3x10 <sup>2</sup>  |                              | 281             | 55                   |    |
|                                  | <i>Arisaema triphyllum</i>      | 3.4x10 <sup>-1</sup>        | 2.2x10 <sup>-3</sup>              | 3.2x10 <sup>2</sup>  |                              | 281             | 55                   |    |
|                                  | <i>Arisaema triphyllum</i>      | 3.7x10 <sup>-1</sup>        | 2.0x10 <sup>-3</sup>              | 3.5x10 <sup>2</sup>  |                              | 281             | 55                   |    |
|                                  | <i>Arisaema triphyllum</i>      | 4.9x10 <sup>-1</sup>        | 2.8x10 <sup>-3</sup>              | 2.4x10 <sup>2</sup>  |                              | 281             | 55                   |    |
|                                  | <i>Arisaema triphyllum</i>      | 6.1x10 <sup>-1</sup>        | 1.7x10 <sup>-3</sup>              | 4.0x10 <sup>2</sup>  |                              | 281             | 55                   |    |
|                                  | <i>Arisaema triphyllum</i>      | 7.3x10 <sup>-1</sup>        | 2.8x10 <sup>-3</sup>              | 2.4x10 <sup>2</sup>  |                              | 281             | 55                   |    |
|                                  | <i>Arisaema triphyllum</i>      | 1.2x10 <sup>-1</sup>        | 7.0x10 <sup>-3</sup>              | 9.9x10 <sup>1</sup>  |                              | 281             | 55                   |    |
|                                  | <i>Arisaema triphyllum</i>      | 2.2x10 <sup>-1</sup>        | 4.4x10 <sup>-3</sup>              | 1.6x10 <sup>2</sup>  |                              | 281             | 55                   |    |
|                                  | <i>Arisaema triphyllum</i>      | 2.5x10 <sup>-1</sup>        | 8.1x10 <sup>-3</sup>              | 8.6x10 <sup>1</sup>  |                              | 281             | 55                   |    |
|                                  | <i>Arisaema triphyllum</i>      | 3.4x10 <sup>-1</sup>        | 1.6x10 <sup>-3</sup>              | 4.3x10 <sup>2</sup>  |                              | 281             | 55                   |    |
|                                  | <i>Arisaema triphyllum</i>      | 3.7x10 <sup>-1</sup>        | 6.2x10 <sup>-3</sup>              | 1.1x10 <sup>2</sup>  |                              | 281             | 55                   |    |
|                                  | <i>Arisaema triphyllum</i>      | 4.7x10 <sup>-1</sup>        | 4.3x10 <sup>-3</sup>              | 1.6x10 <sup>2</sup>  |                              | 281             | 55                   |    |
|                                  | <i>Arisaema triphyllum</i>      | 4.9x10 <sup>-1</sup>        | 4.6x10 <sup>-3</sup>              | 1.5x10 <sup>2</sup>  |                              | 281             | 55                   |    |
|                                  | <i>Arisaema triphyllum</i>      | 6.2x10 <sup>-1</sup>        | 2.3x10 <sup>-3</sup>              | 3.0x10 <sup>2</sup>  |                              | 281             | 55                   |    |
|                                  | <i>Arisaema triphyllum</i>      | 7.4x10 <sup>-1</sup>        | 9.0x10 <sup>-4</sup>              | 7.7x10 <sup>2</sup>  |                              | 281             | 55                   |    |
|                                  | <i>Aristula hamulosa</i>        |                             |                                   | 1.6x10 <sup>-3</sup> | 4.4x10 <sup>2</sup>          |                 | 294                  | 56 |
|                                  | <i>Arnica cordifolia</i>        |                             |                                   | 2.1x10 <sup>-4</sup> | 3.3x10 <sup>3</sup>          |                 | 290                  | 49 |
|                                  | <i>Astragalus utahensis</i>     |                             |                                   | 9.3x10 <sup>-4</sup> | 7.5x10 <sup>2</sup>          |                 | 290                  | 49 |
|                                  | <i>Balsamorhiza macrophylla</i> |                             |                                   | 2.0x10 <sup>-4</sup> | 3.6x10 <sup>3</sup>          |                 | 290                  | 49 |
|                                  | <i>Balsamorhiza sagittata</i>   |                             |                                   | 8.3x10 <sup>-5</sup> | 8.3x10 <sup>3</sup>          |                 | 290                  | 49 |
| <i>Bashania fangiana</i>         |                                 |                             | 1.2x10 <sup>-3</sup>              | 5.9x10 <sup>2</sup>  | 2.3x10 <sup>-4</sup>         | 278             | 57                   |    |
| <i>Boetueloua hirsuta</i>        |                                 |                             | 9.2x10 <sup>-4</sup>              | 7.6x10 <sup>2</sup>  |                              | 294             | 58                   |    |
| <i>Boetueloua hirsuta</i>        |                                 |                             | 6.0x10 <sup>-4</sup>              | 1.2x10 <sup>3</sup>  |                              | 294             | 58                   |    |
| <i>Bouteloua chondrosioides</i>  |                                 |                             | 1.8x10 <sup>-3</sup>              | 3.8x10 <sup>2</sup>  |                              | 294             | 56                   |    |
| <i>Bouteloua curtipendula</i>    |                                 |                             | 1.1x10 <sup>-3</sup>              | 6.5x10 <sup>2</sup>  |                              | 294             | 56                   |    |
| <i>Bouteloua eriopoda</i>        |                                 |                             | 1.1x10 <sup>-3</sup>              | 6.1x10 <sup>2</sup>  |                              | 294             | 56                   |    |
| <i>Bouteloua filiformis</i>      |                                 |                             | 2.5x10 <sup>-3</sup>              | 2.8x10 <sup>2</sup>  |                              | 294             | 56                   |    |

**Table 2. (cont).**

| Plant type                       | Species (or community)        | Individual plant mass (gDW) | Mortality rate (d <sup>-1</sup> ) | Half-life (d)       | Birthrate (d <sup>-1</sup> ) | Temperature (K) | Source<br>Plant data |
|----------------------------------|-------------------------------|-----------------------------|-----------------------------------|---------------------|------------------------------|-----------------|----------------------|
| Land herbs and salt marsh plants | <i>Bouteloua hirsuta</i>      |                             | 1.1x10 <sup>-3</sup>              | 6.1x10 <sup>2</sup> |                              | 294             | 56                   |
|                                  | <i>Bouteloua rothrockii</i>   |                             | 5.6x10 <sup>-3</sup>              | 1.2x10 <sup>2</sup> |                              | 294             | 56                   |
|                                  | <i>Brachypodium pinnatum</i>  | 3.2x10 <sup>-1</sup>        | 1.4x10 <sup>-3</sup>              | 4.8x10 <sup>2</sup> | 2.0x10 <sup>-2</sup>         | 283             | 59                   |
|                                  | <i>Brachypodium pinnatum</i>  | 2.9x10 <sup>-1</sup>        | 3.6x10 <sup>-3</sup>              | 1.9x10 <sup>2</sup> | 1.4x10 <sup>-2</sup>         | 283             | 59                   |
|                                  | <i>Brachypodium pinnatum</i>  | 2.7x10 <sup>-1</sup>        | 4.2x10 <sup>-3</sup>              | 1.6x10 <sup>2</sup> | 1.1x10 <sup>-2</sup>         | 283             | 59                   |
|                                  | <i>Carex flacca</i>           | 1.9x10 <sup>-1</sup>        | 2.2x10 <sup>-4</sup>              | 3.1x10 <sup>3</sup> | 2.6x10 <sup>-3</sup>         | 283             | 59                   |
|                                  | <i>Carex flacca</i>           | 2.3x10 <sup>-1</sup>        | 6.1x10 <sup>-4</sup>              | 1.1x10 <sup>3</sup> | 2.7x10 <sup>-3</sup>         | 283             | 59                   |
|                                  | <i>Carex flacca</i>           | 2.0x10 <sup>-1</sup>        | 1.5x10 <sup>-3</sup>              | 4.7x10 <sup>2</sup> | 3.6x10 <sup>-3</sup>         | 283             | 59                   |
|                                  | <i>Catopsis juvenile</i>      |                             | 8.4x10 <sup>-4</sup>              | 8.3x10 <sup>2</sup> | 2.8x10 <sup>-4</sup>         | 292             | 27                   |
|                                  | <i>Catopsis nutans</i>        |                             | 7.8x10 <sup>-4</sup>              | 8.9x10 <sup>2</sup> |                              | 292             | 27                   |
|                                  | <i>Catopsis sessiliflora</i>  |                             | 5.2x10 <sup>-4</sup>              | 1.3x10 <sup>3</sup> |                              | 292             | 27                   |
|                                  | <i>Catopsis ssp.</i>          | 2.3x10 <sup>-2</sup>        | 7.4x10 <sup>-4</sup>              | 9.4x10 <sup>2</sup> | 1.6x10 <sup>-4</sup>         | 292             | 27                   |
|                                  | <i>Chloris acicularis</i>     |                             | 3.2x10 <sup>-5</sup>              | 2.2x10 <sup>4</sup> |                              | 282             | 53                   |
|                                  | <i>Clintonia borealis</i>     |                             | 3.4x10 <sup>-2</sup>              | 2.0x10 <sup>1</sup> |                              | 279             | 53                   |
|                                  | <i>Clintonia borealis</i>     |                             | 1.8x10 <sup>-2</sup>              | 3.8x10 <sup>1</sup> |                              | 279             | 53                   |
|                                  | <i>Clintonia borealis</i>     |                             | 1.3x10 <sup>-2</sup>              | 5.3x10 <sup>1</sup> |                              | 279             | 53                   |
|                                  | <i>Clintonia borealis</i>     |                             | 2.7x10 <sup>-2</sup>              | 2.6x10 <sup>1</sup> |                              | 279             | 53                   |
|                                  | <i>Clintonia borealis</i>     |                             | 9.1x10 <sup>-4</sup>              | 7.6x10 <sup>2</sup> |                              | 279             | 53                   |
|                                  | <i>Cynoglossum officinale</i> | 2.1x10 <sup>0</sup>         | 2.1x10 <sup>-3</sup>              | 3.2x10 <sup>2</sup> |                              | 283             | 60                   |
|                                  | <i>Cynoglossum officinale</i> | 3.8x10 <sup>0</sup>         | 9.4x10 <sup>-4</sup>              | 7.4x10 <sup>2</sup> |                              | 283             | 60                   |
|                                  | <i>Cynoglossum officinale</i> | 2.8x10 <sup>0</sup>         | 1.9x10 <sup>-4</sup>              | 3.6x10 <sup>3</sup> |                              | 283             | 60                   |
|                                  | <i>Danthonia cespitosa</i>    |                             | 1.0x10 <sup>-3</sup>              | 6.8x10 <sup>2</sup> |                              | 282             | 53                   |
|                                  | <i>Dichaea neglecta</i>       |                             | 1.5x10 <sup>-4</sup>              | 4.7x10 <sup>3</sup> | 4.0x10 <sup>-4</sup>         | 292             | 27                   |
|                                  | <i>Drosera intermedia</i>     |                             | 6.4x10 <sup>-4</sup>              | 1.1x10 <sup>3</sup> |                              | 283             | 61                   |
|                                  | <i>Drosera intermedia</i>     |                             | 7.8x10 <sup>-4</sup>              | 8.9x10 <sup>2</sup> |                              | 283             | 61                   |
|                                  | <i>Drosera intermedia</i>     |                             | 9.4x10 <sup>-4</sup>              | 7.4x10 <sup>2</sup> |                              | 283             | 61                   |
| <i>Drosera intermedia</i>        |                               | 6.7x10 <sup>-4</sup>        | 1.0x10 <sup>3</sup>               |                     | 283                          | 61              |                      |

**Table 2. (cont).**

| Plant type                       | Species (or community)       | Individual plant mass (gDW) | Mortality rate (d <sup>-1</sup> ) | Half-life (d)        | Birthrate (d <sup>-1</sup> ) | Temperature (K) | Source<br>Plant data |
|----------------------------------|------------------------------|-----------------------------|-----------------------------------|----------------------|------------------------------|-----------------|----------------------|
| Land herbs and salt marsh plants | <i>Drosera intermedia</i>    |                             | 1.7×10 <sup>-3</sup>              | 4.1×10 <sup>2</sup>  |                              | 283             | 61                   |
|                                  | <i>Eichhornia crassipes</i>  |                             | 1.1×10 <sup>-1</sup>              | 6.3×10 <sup>0</sup>  |                              |                 | 62                   |
|                                  | <i>Eichhornia crassipes</i>  |                             | 8.0×10 <sup>-2</sup>              | 8.7×10 <sup>0</sup>  |                              | 298             | 62                   |
|                                  | <i>Eichhornia crassipes</i>  |                             | 6.0×10 <sup>-2</sup>              | 1.2×10 <sup>1</sup>  |                              | 295             | 62                   |
|                                  | <i>Eichhornia crassipes</i>  |                             | 3.0×10 <sup>-2</sup>              | 2.3×10 <sup>1</sup>  |                              |                 | 62                   |
|                                  | <i>Eichhornia crassipes</i>  |                             | 1.1×10 <sup>-1</sup>              | 6.3×10 <sup>0</sup>  |                              | 298             | 62                   |
|                                  | <i>Eichhornia crassipes</i>  |                             | 2.2×10 <sup>-1</sup>              | 3.2×10 <sup>0</sup>  |                              | 295             | 62                   |
|                                  | <i>Encyclia ochracea</i>     |                             | 1.1×10 <sup>-4</sup>              | 6.1×10 <sup>3</sup>  | 8.9×10 <sup>-5</sup>         | 292             | 27                   |
|                                  | <i>Eriophorum vaginatum</i>  |                             | 2.7×10 <sup>-4</sup>              | 2.5×10 <sup>3</sup>  | 6.8×10 <sup>-4</sup>         | 267             | 63                   |
|                                  | <i>Eriophorum vaginatum</i>  |                             | 4.2×10 <sup>-4</sup>              | 1.7×10 <sup>3</sup>  | 7.6×10 <sup>-4</sup>         |                 | 63                   |
|                                  | <i>Fargesia robusta</i>      |                             | 3.2×10 <sup>-4</sup>              | 2.2×10 <sup>3</sup>  | 1.8×10 <sup>-4</sup>         | 278             | 57                   |
|                                  | <i>Fargesia scabrida</i>     |                             | 2.4×10 <sup>-4</sup>              | 2.9×10 <sup>3</sup>  |                              | 290             | 64                   |
|                                  | <i>Fargesia spathacea</i>    |                             | 3.3×10 <sup>-4</sup>              | 2.1×10 <sup>3</sup>  |                              | 290             | 64                   |
|                                  | <i>Fargesia spathacea</i>    |                             | 2.6×10 <sup>-4</sup>              | 2.6×10 <sup>3</sup>  |                              | 290             | 64                   |
|                                  | <i>Hedysarum boreale</i>     |                             | 1.4×10 <sup>-4</sup>              | 5.0×10 <sup>3</sup>  |                              | 290             | 49                   |
|                                  | <i>Heteropogon contortus</i> |                             | 2.4×10 <sup>-3</sup>              | 2.9×10 <sup>2</sup>  |                              | 294             | 56                   |
|                                  | <i>Hieracium pilosella</i>   |                             | 1.4×10 <sup>-3</sup>              | 5.0×10 <sup>2</sup>  | 2.3×10 <sup>-3</sup>         | 283             | 65                   |
|                                  | <i>Hieracium pilosella</i>   |                             | 8.4×10 <sup>-4</sup>              | 8.3×10 <sup>2</sup>  | 1.9×10 <sup>-3</sup>         | 283             | 65                   |
|                                  | <i>Hieracium pilosella</i>   |                             | 1.9×10 <sup>-3</sup>              | 3.6×10 <sup>2</sup>  | 1.1×10 <sup>-3</sup>         | 283             | 66                   |
|                                  | <i>Hieracium pilosella</i>   |                             | 9.1×10 <sup>-4</sup>              | 7.6×10 <sup>2</sup>  | 6.1×10 <sup>-4</sup>         | 283             | 66                   |
|                                  | <i>Hieracium pilosella</i>   |                             | 3.1×10 <sup>-3</sup>              | 2.3×10 <sup>2</sup>  | 1.6×10 <sup>-3</sup>         | 283             | 66                   |
|                                  | <i>Hieracium pilosella</i>   |                             | 4.8×10 <sup>-3</sup>              | 1.4×10 <sup>2</sup>  | 8.4×10 <sup>-4</sup>         | 283             | 66                   |
|                                  | <i>Hilaria belangeri</i>     |                             |                                   | 4.0×10 <sup>-3</sup> | 1.7×10 <sup>2</sup>          |                 | 294                  |
| <i>Impatiens capensis</i>        |                              | 1.5×10 <sup>-1</sup>        | 5.8×10 <sup>-3</sup>              | 1.2×10 <sup>2</sup>  |                              | 281             | 67                   |
| <i>Impatiens pallida</i>         |                              | 1.1×10 <sup>0</sup>         | 1.8×10 <sup>-2</sup>              | 3.8×10 <sup>1</sup>  |                              | 279             | 68                   |
| <i>Impatiens pallida</i>         |                              | 7.5×10 <sup>-1</sup>        | 2.2×10 <sup>-2</sup>              | 3.2×10 <sup>1</sup>  |                              | 279             | 68                   |
| <i>Iris pseudacorus</i>          |                              | 6.7×10 <sup>1</sup>         | 4.2×10 <sup>-4</sup>              | 1.7×10 <sup>3</sup>  |                              |                 | 69                   |

**Table 2. (cont).**

| Plant type                       | Species (or community)          | Individual plant mass (gDW) | Mortality rate (d <sup>-1</sup> ) | Half-life (d)        | Birthrate (d <sup>-1</sup> ) | Temperature (K) | Source<br>Plant data |
|----------------------------------|---------------------------------|-----------------------------|-----------------------------------|----------------------|------------------------------|-----------------|----------------------|
| Land herbs and salt marsh plants | <i>Iris pseudacorus</i>         | 1.3x10 <sup>0</sup>         | 5.8x10 <sup>-4</sup>              | 1.2x10 <sup>3</sup>  |                              |                 | 69                   |
|                                  | <i>Iris pseudacorus</i>         | 1.2x10 <sup>2</sup>         | 2.3x10 <sup>-4</sup>              | 3.0x10 <sup>3</sup>  |                              |                 | 69                   |
|                                  | <i>Iris pseudacorus</i>         | 3.8x10 <sup>1</sup>         | 2.2x10 <sup>-4</sup>              | 3.2x10 <sup>3</sup>  |                              |                 | 69                   |
|                                  | <i>Jacquiella teretifolia</i>   |                             | 5.8x10 <sup>-5</sup>              | 1.2x10 <sup>4</sup>  |                              | 292             | 27                   |
|                                  | <i>Koeleria cristata</i>        |                             | 1.6x10 <sup>-3</sup>              | 4.4x10 <sup>2</sup>  |                              | 280             | 50                   |
|                                  | <i>Koeleria cristata</i>        |                             | 1.7x10 <sup>-3</sup>              | 4.2x10 <sup>2</sup>  |                              | 280             | 50                   |
|                                  | <i>L aspera x L cylindracea</i> |                             | 1.6x10 <sup>-4</sup>              | 4.3x10 <sup>3</sup>  |                              | 283             | 48                   |
|                                  | <i>L aspera x L spicata</i>     |                             | 1.9x10 <sup>-4</sup>              | 3.6x10 <sup>3</sup>  |                              | 283             | 48                   |
|                                  | <i>Lathyrus latifolius</i>      |                             | 6.3x10 <sup>-3</sup>              | 1.1x10 <sup>2</sup>  |                              | 285             | 70                   |
|                                  | <i>Lathyrus sylvestris</i>      |                             | 6.5x10 <sup>-3</sup>              | 1.1x10 <sup>2</sup>  |                              | 286             | 70                   |
|                                  | <i>Lathyrus sylvestris</i>      |                             | 5.9x10 <sup>-3</sup>              | 1.2x10 <sup>2</sup>  |                              | 286             | 70                   |
|                                  | <i>Liatris aspera</i>           |                             | 1.2x10 <sup>-4</sup>              | 5.8x10 <sup>3</sup>  |                              | 283             | 48                   |
|                                  | <i>Liatris cylindracea</i>      |                             | 1.4x10 <sup>-4</sup>              | 5.0x10 <sup>3</sup>  |                              | 283             | 48                   |
|                                  | <i>Liatris spicata</i>          |                             | 1.5x10 <sup>-4</sup>              | 4.7x10 <sup>3</sup>  |                              | 283             | 48                   |
|                                  | <i>Lycaste aromatica</i>        |                             | 2.8x10 <sup>-4</sup>              | 2.5x10 <sup>3</sup>  | 2.3x10 <sup>-4</sup>         | 292             | 27                   |
|                                  | <i>Lycurus phleoides</i>        |                             | 9.5x10 <sup>-4</sup>              | 7.3x10 <sup>2</sup>  |                              | 294             | 56                   |
|                                  | <i>Lycurus phleoides</i>        |                             | 1.2x10 <sup>-3</sup>              | 5.8x10 <sup>2</sup>  |                              | 294             | 58                   |
|                                  | <i>Lycurus phleoides</i>        |                             | 7.1x10 <sup>-4</sup>              | 9.7x10 <sup>2</sup>  |                              | 294             | 58                   |
|                                  | <i>Maianthemum canadense</i>    |                             | 8.0x10 <sup>-4</sup>              | 8.7x10 <sup>2</sup>  | 2.0x10 <sup>-3</sup>         | 282             | 71                   |
|                                  | <i>Maianthemum canadense</i>    |                             | 7.5x10 <sup>-4</sup>              | 9.2x10 <sup>2</sup>  | 1.8x10 <sup>-3</sup>         | 282             | 71                   |
| <i>Maianthemum canadense</i>     |                                 | 8.2x10 <sup>-4</sup>        | 8.4x10 <sup>2</sup>               | 1.9x10 <sup>-3</sup> | 282                          | 71              |                      |
| <i>Maianthemum canadense</i>     |                                 | 7.6x10 <sup>-4</sup>        | 9.1x10 <sup>2</sup>               | 1.5x10 <sup>-3</sup> | 282                          | 71              |                      |
| <i>Maianthemum canadense</i>     |                                 | 4.8x10 <sup>-4</sup>        | 1.5x10 <sup>3</sup>               | 2.5x10 <sup>-3</sup> | 282                          | 71              |                      |
| <i>Mercurialis perennis</i>      | 3.7x10 <sup>-1</sup>            | 2.1x10 <sup>-3</sup>        | 3.4x10 <sup>2</sup>               |                      | 283                          | 72              |                      |
| <i>Oryzopsis hymenoides</i>      |                                 | 1.7x10 <sup>-3</sup>        | 4.1x10 <sup>2</sup>               |                      | 280                          | 50              |                      |
| <i>Oryzopsis hymenoides</i>      |                                 | 1.7x10 <sup>-3</sup>        | 4.0x10 <sup>2</sup>               |                      | 280                          | 50              |                      |
| <i>Panax quinquefolium</i>       | 4.3x10 <sup>-1</sup>            | 2.8x10 <sup>-4</sup>        | 2.4x10 <sup>3</sup>               | 4.2x10 <sup>-4</sup> | 285                          | 73              |                      |



**Table 2. (cont).**

| Plant type                       | Species (or community)       | Individual plant mass (gDW) | Mortality rate (d <sup>-1</sup> ) | Half-life (d)        | Birthrate (d <sup>-1</sup> ) | Temperature (K) | Source<br>Plant data |
|----------------------------------|------------------------------|-----------------------------|-----------------------------------|----------------------|------------------------------|-----------------|----------------------|
| Land herbs and salt marsh plants | <i>Peperomia</i>             |                             | 8.4x10 <sup>-4</sup>              | 8.2x10 <sup>2</sup>  | 1.2x10 <sup>-3</sup>         | 292             | 27                   |
|                                  | <i>Peperomia aff. alata</i>  |                             | 7.0x10 <sup>-4</sup>              | 1.0x10 <sup>3</sup>  | 3.4x10 <sup>-4</sup>         | 292             | 27                   |
|                                  | <i>Peperomia quadrifolia</i> |                             | 2.5x10 <sup>-4</sup>              | 2.8x10 <sup>3</sup>  | 2.0x10 <sup>-4</sup>         | 292             | 27                   |
|                                  | <i>Peperomia reflexa</i>     |                             | 2.4x10 <sup>-4</sup>              | 2.9x10 <sup>3</sup>  | 2.0x10 <sup>-4</sup>         | 292             | 27                   |
|                                  | <i>Plantago coronopus</i>    |                             | 2.2x10 <sup>-3</sup>              | 3.2x10 <sup>2</sup>  |                              | 283             | 74                   |
|                                  | <i>Plantago coronopus</i>    |                             | 2.4x10 <sup>-3</sup>              | 2.9x10 <sup>2</sup>  |                              | 283             | 74                   |
|                                  | <i>Plantago coronopus</i>    |                             | 1.8x10 <sup>-2</sup>              | 3.8x10 <sup>1</sup>  |                              | 283             | 74                   |
|                                  | <i>Plantago coronopus</i>    |                             | 1.5x10 <sup>-3</sup>              | 4.7x10 <sup>2</sup>  |                              | 283             | 74                   |
|                                  | <i>Plantago lanceolata</i>   |                             | 1.7x10 <sup>-3</sup>              | 4.1x10 <sup>2</sup>  |                              | 283             | 58                   |
|                                  | <i>Plantago major</i>        |                             | 1.3x10 <sup>-3</sup>              | 5.4x10 <sup>2</sup>  | 5.1x10 <sup>-3</sup>         | 281             | 75                   |
|                                  | <i>Plantago maritima</i>     |                             | 1.6x10 <sup>-4</sup>              | 4.4x10 <sup>3</sup>  |                              | 279             | 76                   |
|                                  | <i>Plantago maritima</i>     |                             | 4.2x10 <sup>-4</sup>              | 1.6x10 <sup>3</sup>  |                              | 279             | 76                   |
|                                  | <i>Plantago maritima</i>     |                             | 7.5x10 <sup>-4</sup>              | 9.3x10 <sup>2</sup>  |                              | 279             | 76                   |
|                                  | <i>Plantago maritima</i>     |                             | 2.1x10 <sup>-4</sup>              | 3.3x10 <sup>3</sup>  |                              | 279             | 76                   |
|                                  | <i>Plantago maritima</i>     |                             | 3.1x10 <sup>-4</sup>              | 2.2x10 <sup>3</sup>  |                              | 279             | 76                   |
|                                  | <i>Plantago maritima</i>     |                             | 7.1x10 <sup>-4</sup>              | 9.8x10 <sup>2</sup>  |                              | 279             | 76                   |
|                                  | <i>Plantago maritima</i>     |                             | 8.8x10 <sup>-4</sup>              | 7.9x10 <sup>2</sup>  |                              | 279             | 76                   |
|                                  | <i>Plantago rugelii</i>      |                             | 5.9x10 <sup>-3</sup>              | 1.2x10 <sup>2</sup>  | 3.8x10 <sup>-3</sup>         | 281             | 75                   |
|                                  | <i>Poa ssp.</i>              |                             | 1.8x10 <sup>-3</sup>              | 3.9x10 <sup>2</sup>  |                              | 280             | 50                   |
|                                  | <i>Poa ssp.</i>              |                             | 1.4x10 <sup>-3</sup>              | 4.9x10 <sup>2</sup>  |                              | 280             | 50                   |
| <i>Potentilla matsumurae</i>     | 1.8x10 <sup>0</sup>          | 1.2x10 <sup>-2</sup>        | 5.7x10 <sup>1</sup>               |                      | 288                          | 77              |                      |
| <i>Potentilla matsumurae</i>     | 1.1x10 <sup>0</sup>          | 1.0x10 <sup>-3</sup>        | 6.8x10 <sup>2</sup>               |                      | 288                          | 77              |                      |
| <i>Ranunculus acris</i>          |                              | 6.4x10 <sup>-4</sup>        | 1.1x10 <sup>3</sup>               |                      |                              | 58              |                      |
| <i>Ranunculus acris</i>          |                              | 1.5x10 <sup>-3</sup>        | 4.5x10 <sup>2</sup>               | 2.9x10 <sup>-3</sup> | 283                          | 58              |                      |
| <i>Ranunculus auricomus</i>      |                              | 3.2x10 <sup>-4</sup>        | 2.2x10 <sup>3</sup>               |                      |                              | 58              |                      |
| <i>Ranunculus bulbosus</i>       |                              | 2.2x10 <sup>-3</sup>        | 3.1x10 <sup>2</sup>               | 3.0x10 <sup>-3</sup> | 283                          | 58              |                      |
| <i>Ranunculus repens</i>         |                              | 1.7x10 <sup>-3</sup>        | 4.1x10 <sup>2</sup>               | 1.7x10 <sup>-3</sup> | 282                          | 78              |                      |

**Table 2. (cont).**

| Plant type                       | Species (or community)         | Individual plant mass (gDW) | Mortality rate (d <sup>-1</sup> ) | Half-life (d)        | Birthrate (d <sup>-1</sup> ) | Temperature (K) | Source<br>Plant data |
|----------------------------------|--------------------------------|-----------------------------|-----------------------------------|----------------------|------------------------------|-----------------|----------------------|
| Land herbs and salt marsh plants | <i>Ranunculus repens</i>       |                             | 1.6x10 <sup>-3</sup>              | 4.3x10 <sup>2</sup>  | 2.0x10 <sup>-3</sup>         | 282             | 51                   |
|                                  | <i>Ranunculus repens</i>       |                             | 1.7x10 <sup>-3</sup>              | 4.0x10 <sup>2</sup>  | 3.0x10 <sup>-3</sup>         | 283             | 58                   |
|                                  | <i>Salicornia europea</i>      | 7.0x10 <sup>-2</sup>        | 4.3x10 <sup>-3</sup>              | 1.6x10 <sup>2</sup>  |                              | 283             | 79                   |
|                                  | <i>Salicornia europea</i>      | 1.8x10 <sup>-2</sup>        | 4.0x10 <sup>-3</sup>              | 1.7x10 <sup>2</sup>  |                              | 283             | 79                   |
|                                  | <i>Sinarundianria fangiana</i> |                             | 2.7x10 <sup>-4</sup>              | 2.6x10 <sup>3</sup>  |                              | 290             | 64                   |
|                                  | <i>Sinarundianria fangiana</i> |                             | 2.3x10 <sup>-4</sup>              | 3.0x10 <sup>3</sup>  |                              | 290             | 64                   |
|                                  | <i>Solidago canadensis</i>     | 1.9x10 <sup>-1</sup>        | 4.5x10 <sup>-3</sup>              | 1.5x10 <sup>2</sup>  | 7.9x10 <sup>-4</sup>         | 280             | 80                   |
|                                  | <i>Solidago canadensis</i>     | 1.4x10 <sup>-1</sup>        | 2.2x10 <sup>-3</sup>              | 3.1x10 <sup>2</sup>  | 1.1x10 <sup>-3</sup>         | 280             | 80                   |
|                                  | <i>Spartina alterniflora</i>   | 4.1x10 <sup>-1</sup>        | 2.1x10 <sup>-3</sup>              | 3.4x10 <sup>2</sup>  | 2.6x10 <sup>-3</sup>         | 287             | 81                   |
|                                  | <i>Spartina alterniflora</i>   | 3.5x10 <sup>-1</sup>        | 2.3x10 <sup>-3</sup>              | 3.0x10 <sup>2</sup>  | 3.4x10 <sup>-3</sup>         | 287             | 81                   |
|                                  | <i>Spartina alterniflora</i>   | 1.9x10 <sup>-1</sup>        | 1.9x10 <sup>-3</sup>              | 3.7x10 <sup>2</sup>  | 2.6x10 <sup>-3</sup>         | 287             | 81                   |
|                                  | <i>Spartina alterniflora</i>   | 3.3x10 <sup>-1</sup>        | 2.1x10 <sup>-3</sup>              | 3.3x10 <sup>2</sup>  | 2.9x10 <sup>-3</sup>         | 287             | 81                   |
|                                  | <i>Spergularia maritima</i>    |                             | 7.3x10 <sup>-4</sup>              | 9.5x10 <sup>2</sup>  |                              | 281             | 82                   |
|                                  | <i>Stipa comata</i>            |                             | 1.8x10 <sup>-3</sup>              | 3.9x10 <sup>2</sup>  |                              | 280             | 50                   |
|                                  | <i>Stipa comata</i>            |                             | 1.7x10 <sup>-3</sup>              | 4.1x10 <sup>2</sup>  |                              | 280             | 50                   |
|                                  | <i>Taraxacum</i>               |                             | 6.5x10 <sup>-4</sup>              | 1.1x10 <sup>3</sup>  |                              | 283             | 83                   |
|                                  | <i>Taraxacum</i>               |                             | 6.2x10 <sup>-4</sup>              | 1.1x10 <sup>3</sup>  |                              | 283             | 83                   |
|                                  | <i>Taraxacum</i>               |                             | 8.4x10 <sup>-4</sup>              | 8.3x10 <sup>2</sup>  |                              | 283             | 83                   |
|                                  | <i>Thalictrum fenderli</i>     |                             | 2.1x10 <sup>-4</sup>              | 3.3x10 <sup>3</sup>  |                              | 290             | 49                   |
|                                  | <i>Tillandsia</i>              |                             | 1.1x10 <sup>-3</sup>              | 6.3x10 <sup>2</sup>  | 9.9x10 <sup>-4</sup>         | 292             | 27                   |
| <i>Tillandsia</i>                |                                | 5.9x10 <sup>-4</sup>        | 1.2x10 <sup>3</sup>               | 8.0x10 <sup>-5</sup> | 292                          | 27              |                      |
| <i>Tillandsia</i>                | 1.7x10 <sup>-1</sup>           | 7.4x10 <sup>-4</sup>        | 9.4x10 <sup>2</sup>               | 4.4x10 <sup>-5</sup> | 292                          | 27              |                      |
| <i>Tillandsia butzii</i>         |                                | 3.8x10 <sup>-4</sup>        | 1.8x10 <sup>3</sup>               | .                    | 292                          | 27              |                      |
| <i>Tillandsia deppeana</i>       |                                | 4.0x10 <sup>-4</sup>        | 1.7x10 <sup>3</sup>               |                      | 292                          | 27              |                      |
| <i>Tillandsia juncea</i>         |                                | 2.4x10 <sup>-4</sup>        | 2.9x10 <sup>3</sup>               | 1.1x10 <sup>-5</sup> | 292                          | 27              |                      |
| <i>Tillandsia multicaulis</i>    |                                | 1.8x10 <sup>-4</sup>        | 4.0x10 <sup>3</sup>               | .                    | 292                          | 27              |                      |
| <i>Tillandsia punctulata</i>     |                                | 2.7x10 <sup>-4</sup>        | 2.5x10 <sup>3</sup>               | 2.5x10 <sup>-5</sup> | 292                          | 27              |                      |

**Table 2. (cont).**

| Plant type                       | Species (or community)        | Individual plant mass (gDW) | Mortality rate (d <sup>-1</sup> ) | Half-life (d)        | Birthrate (d <sup>-1</sup> ) | Temperature (K) | Source<br>Plant data |
|----------------------------------|-------------------------------|-----------------------------|-----------------------------------|----------------------|------------------------------|-----------------|----------------------|
| Land herbs and salt marsh plants | <i>Tillandsia spp.</i>        |                             | 5.3x10 <sup>-4</sup>              | 1.3x10 <sup>3</sup>  | 1.9x10 <sup>-4</sup>         | 292             | 27                   |
|                                  | <i>Trichachne californica</i> |                             | 4.3x10 <sup>-4</sup>              | 1.6x10 <sup>3</sup>  |                              | 294             | 58                   |
|                                  | <i>Trichachne californica</i> |                             | 3.9x10 <sup>-4</sup>              | 1.8x10 <sup>3</sup>  |                              | 294             | 58                   |
|                                  | <i>Trifolium repens</i>       | 9.0x10 <sup>-2</sup>        | 2.4x10 <sup>-3</sup>              | 2.9x10 <sup>2</sup>  |                              | 281             | 84                   |
|                                  | <i>Trifolium repens</i>       | 1.7x10 <sup>-1</sup>        | 2.0x10 <sup>-3</sup>              | 3.4x10 <sup>2</sup>  |                              | 281             | 84                   |
|                                  | <i>Trifolium repens</i>       | 2.1x10 <sup>-1</sup>        | 2.6x10 <sup>-3</sup>              | 2.7x10 <sup>2</sup>  |                              | 281             | 84                   |
|                                  | <i>Trifolium repens</i>       | 4.1x10 <sup>-1</sup>        | 1.7x10 <sup>-3</sup>              | 4.1x10 <sup>2</sup>  |                              | 281             | 84                   |
|                                  | <i>Truchachne californica</i> |                             | 1.1x10 <sup>-3</sup>              | 6.5x10 <sup>2</sup>  |                              | 294             | 56                   |
|                                  | <i>Typha latifolia</i>        | 3.1x10 <sup>1</sup>         | 3.8x10 <sup>-3</sup>              | 1.8x10 <sup>2</sup>  | 3.0x10 <sup>-3</sup>         | 282             | 85                   |
|                                  | <i>Urtica dioica</i>          | 3.0x10 <sup>0</sup>         | 9.6x10 <sup>-3</sup>              | 7.2x10 <sup>1</sup>  |                              | 281             | 86                   |
|                                  | <i>Urtica dioica</i>          | 3.0x10 <sup>0</sup>         | 9.8x10 <sup>-3</sup>              | 7.1x10 <sup>1</sup>  |                              | 280             | 86                   |
|                                  | <i>Viola blanda</i>           | 7.6x10 <sup>-1</sup>        | 8.7x10 <sup>-4</sup>              | 7.9x10 <sup>2</sup>  | 1.1x10 <sup>-3</sup>         | 282             | 87                   |
|                                  | <i>Viola blanda</i>           | 7.6x10 <sup>-1</sup>        | 7.4x10 <sup>-4</sup>              | 9.3x10 <sup>2</sup>  | 1.8x10 <sup>-3</sup>         | 282             | 87                   |
|                                  | <i>Wyethia amplexicaule</i>   |                             | 7.9x10 <sup>-4</sup>              | 8.8x10 <sup>2</sup>  |                              | 290             | 49                   |
|                                  | Succulent plants              | <i>Beaucarnea gracilis</i>  |                                   | 9.9x10 <sup>-3</sup> | 7.0x10 <sup>1</sup>          |                 | 293                  |
| <i>Beaucarnea gracilis</i>       |                               |                             | 9.6x10 <sup>-3</sup>              | 7.2x10 <sup>1</sup>  |                              | 293             | 88                   |
| <i>Carnegiea gigantea</i>        |                               | 4.2x10 <sup>3</sup>         | 2.9x10 <sup>-5</sup>              | 2.4x10 <sup>4</sup>  | 6.7x10 <sup>-6</sup>         | 293             | 89                   |
| <i>Carnegiea gigantea</i>        |                               | 4.4x10 <sup>2</sup>         | 3.4x10 <sup>-5</sup>              | 2.1x10 <sup>4</sup>  | 3.6x10 <sup>-5</sup>         | 293             | 89                   |
| <i>Carnegiea gigantea</i>        |                               | 7.1x10 <sup>2</sup>         | 2.6x10 <sup>-5</sup>              | 2.7x10 <sup>4</sup>  | 3.4x10 <sup>-5</sup>         | 293             | 89                   |
| <i>Carnegiea gigantea</i>        |                               | 6.1x10 <sup>3</sup>         | 3.6x10 <sup>-5</sup>              | 1.9x10 <sup>4</sup>  | 7.7x10 <sup>-6</sup>         | 293             | 89                   |
| <i>Neobuxbaumia tetetzo</i>      |                               |                             | 1.9x10 <sup>-2</sup>              | 3.6x10 <sup>1</sup>  |                              | 293             | 88                   |
| <i>Neobuxbaumia tetetzo</i>      |                               |                             | 2.0x10 <sup>-2</sup>              | 3.5x10 <sup>1</sup>  |                              | 293             | 88                   |
| <i>Pachycereus hollianus</i>     |                               |                             | 1.1x10 <sup>-2</sup>              | 6.2x10 <sup>1</sup>  |                              | 293             | 88                   |
| <i>Pachycereus hollianus</i>     |                               |                             | 1.5x10 <sup>-2</sup>              | 4.7x10 <sup>1</sup>  |                              | 293             | 88                   |
| <i>Yucca periculosa</i>          |                               |                             | 1.6x10 <sup>-2</sup>              | 4.5x10 <sup>1</sup>  |                              | 293             | 88                   |
| <i>Yucca periculosa</i>          |                               |                             | 7.3x10 <sup>-3</sup>              | 9.5x10 <sup>1</sup>  |                              | 293             | 88                   |

**Table 2. (cont).**

| Plant type        | Species (or community)      | Individual plant mass (gDW)        | Mortality rate (d <sup>-1</sup> ) | Half-life (d)        | Birthrate (d <sup>-1</sup> ) | Temperature (K) | Source<br>Plant data |
|-------------------|-----------------------------|------------------------------------|-----------------------------------|----------------------|------------------------------|-----------------|----------------------|
| Shrubs and lianas | <i>Artemisa tridentata</i>  |                                    | 1.5x10 <sup>-3</sup>              | 4.5x10 <sup>2</sup>  |                              | 280             | 50                   |
|                   | <i>Artemisa tridentata</i>  |                                    | 1.8x10 <sup>-3</sup>              | 3.8x10 <sup>2</sup>  |                              | 280             | 50                   |
|                   | <i>Gutierreiza sarothae</i> |                                    | 1.4x10 <sup>-3</sup>              | 4.9x10 <sup>2</sup>  |                              | 280             | 50                   |
|                   | <i>Gutierreiza sarothae</i> |                                    | 1.5x10 <sup>-3</sup>              | 4.6x10 <sup>2</sup>  |                              | 280             | 50                   |
|                   | <i>Ipomoea phillomega</i>   |                                    | 1.2x10 <sup>-1</sup>              | 6.0x10 <sup>0</sup>  |                              | 298             | 90                   |
|                   | <i>Ipomoea phillomega</i>   |                                    | 2.9x10 <sup>-2</sup>              | 2.4x10 <sup>1</sup>  |                              | 298             | 90                   |
|                   | <i>Ipomoea phillomega</i>   |                                    | 2.2x10 <sup>-2</sup>              | 3.2x10 <sup>1</sup>  |                              | 298             | 90                   |
|                   | <i>Ipomoea phillomega</i>   |                                    | 9.9x10 <sup>-3</sup>              | 7.0x10 <sup>1</sup>  |                              | 298             | 90                   |
|                   | <i>Ipomoea phillomega</i>   |                                    | 3.6x10 <sup>-2</sup>              | 2.0x10 <sup>1</sup>  |                              | 298             | 90                   |
|                   | <i>Leptocylon pugens</i>    |                                    | 2.1x10 <sup>-3</sup>              | 3.3x10 <sup>2</sup>  |                              | 280             | 50                   |
|                   | <i>Leptocylon pugens</i>    |                                    | 2.1x10 <sup>-3</sup>              | 3.4x10 <sup>2</sup>  |                              | 280             | 50                   |
|                   | <i>Rubus idaeus</i>         |                                    | 3.4x10 <sup>-4</sup>              | 2.0x10 <sup>3</sup>  |                              | 280             | 91                   |
|                   | <i>Rubus idaeus</i>         |                                    | 4.4x10 <sup>-4</sup>              | 1.6x10 <sup>3</sup>  |                              | 280             | 91                   |
|                   | <i>Rubus idaeus</i>         |                                    | 1.1x10 <sup>-3</sup>              | 6.5x10 <sup>2</sup>  |                              | 280             | 91                   |
|                   | <i>Rubus idaeus</i>         |                                    | 8.8x10 <sup>-4</sup>              | 7.9x10 <sup>2</sup>  |                              | 280             | 91                   |
|                   | <i>Rubus pubescens</i>      |                                    | 1.1x10 <sup>-4</sup>              | 6.5x10 <sup>3</sup>  |                              | 280             | 91                   |
|                   | <i>Rubus pubescens</i>      |                                    | 1.6x10 <sup>-4</sup>              | 4.5x10 <sup>3</sup>  |                              | 280             | 91                   |
|                   | <i>Rubus pubescens</i>      |                                    | 2.2x10 <sup>-4</sup>              | 3.2x10 <sup>3</sup>  |                              | 280             | 91                   |
|                   | <i>Rubus pubescens</i>      |                                    | 1.7x10 <sup>-4</sup>              | 4.0x10 <sup>3</sup>  |                              | 280             | 91                   |
|                   |                             | <i>Symphoricarpos occidentalis</i> | 3.5x10 <sup>1</sup>               | 2.7x10 <sup>-4</sup> | 2.6x10 <sup>3</sup>          |                 | 273                  |
| Mangroves         | <i>Avicennia alba</i>       | 6.5x10 <sup>0</sup>                | 9.0x10 <sup>-4</sup>              | 7.7x10 <sup>2</sup>  |                              | 301             | 93                   |
|                   | <i>Avicennia alba</i>       | 6.5x10 <sup>0</sup>                | 2.5x10 <sup>-3</sup>              | 2.8x10 <sup>2</sup>  |                              | 301             | 93                   |
|                   | <i>Avicennia alba</i>       | 6.5x10 <sup>0</sup>                | 9.1x10 <sup>-4</sup>              | 7.6x10 <sup>2</sup>  |                              | 301             | 93                   |
|                   | <i>Avicennia alba</i>       | 6.5x10 <sup>0</sup>                | 3.5x10 <sup>-3</sup>              | 2.0x10 <sup>2</sup>  |                              | 301             | 93                   |
|                   | <i>Avicennia alba</i>       | 6.5x10 <sup>0</sup>                | 6.6x10 <sup>-3</sup>              | 1.1x10 <sup>2</sup>  |                              | 301             | 93                   |
|                   | <i>Avicennia alba</i>       | 6.5x10 <sup>0</sup>                | 3.5x10 <sup>-3</sup>              | 2.0x10 <sup>2</sup>  |                              | 301             | 93                   |

**Table 2. (cont).**

| Plant type                   | Species (or community)          | Individual plant mass (gDW) | Mortality rate (d <sup>-1</sup> ) | Half-life (d)       | Birthrate (d <sup>-1</sup> ) | Temperature (K) | Source<br>Plant data |
|------------------------------|---------------------------------|-----------------------------|-----------------------------------|---------------------|------------------------------|-----------------|----------------------|
| Mangroves                    | <i>Avicennia marina</i>         | 3.9x10 <sup>1</sup>         | 4.5x10 <sup>-4</sup>              | 1.5x10 <sup>3</sup> |                              | 301             | 94                   |
|                              | <i>Avicennia marina</i>         |                             | 2.3x10 <sup>-2</sup>              | 3.0x10 <sup>1</sup> |                              | 297             | 95                   |
|                              | <i>Avicennia officinalis</i>    | 1.3x10 <sup>1</sup>         | 2.8x10 <sup>-4</sup>              | 2.5x10 <sup>3</sup> |                              | 301             | 96                   |
|                              | <i>Bruguiera cylindrica</i>     | 2.2x10 <sup>0</sup>         | 1.4x10 <sup>-3</sup>              | 4.8x10 <sup>2</sup> |                              | 301             | 94                   |
|                              | <i>Ceriops tagal</i>            | 3.4x10 <sup>0</sup>         | 8.8x10 <sup>-4</sup>              | 7.9x10 <sup>2</sup> |                              | 301             | 94                   |
|                              | <i>Excoecaria agallocha</i>     | 2.2x10 <sup>0</sup>         | 2.8x10 <sup>-3</sup>              | 2.5x10 <sup>2</sup> |                              | 301             | 94                   |
|                              | <i>Rhizophora apiculata</i>     | 1.8x10 <sup>1</sup>         | 9.8x10 <sup>-4</sup>              | 7.0x10 <sup>2</sup> |                              | 301             | 94                   |
|                              | <i>Rhizophora apiculata</i>     |                             | 2.2x10 <sup>-3</sup>              | 3.2x10 <sup>2</sup> |                              | 301             | 97                   |
|                              | <i>Rhizophora apiculata BL.</i> | 2.3x10 <sup>2</sup>         | 4.2x10 <sup>-4</sup>              | 1.6x10 <sup>3</sup> |                              | 300             | 98                   |
|                              | <i>Rhizophora apiculata BL.</i> | 3.2x10 <sup>2</sup>         | 2.4x10 <sup>-4</sup>              | 2.9x10 <sup>3</sup> |                              | 300             | 98                   |
|                              | <i>Rhizophora mucronata</i>     | 5.7x10 <sup>1</sup>         | 1.1x10 <sup>-3</sup>              | 6.1x10 <sup>2</sup> |                              | 301             | 96                   |
|                              | <i>Rhizophora mucronata</i>     | 7.0x10 <sup>0</sup>         | 5.1x10 <sup>-4</sup>              | 1.4x10 <sup>3</sup> |                              | 301             | 93                   |
|                              | <i>Rhizophora mucronata</i>     | 7.0x10 <sup>0</sup>         | 2.4x10 <sup>-4</sup>              | 2.9x10 <sup>3</sup> |                              | 301             | 93                   |
|                              | <i>Rhizophora mucronata</i>     | 7.0x10 <sup>0</sup>         | 1.7x10 <sup>-4</sup>              | 4.1x10 <sup>3</sup> |                              | 301             | 93                   |
|                              | <i>Rhizophora mucronata</i>     | 7.0x10 <sup>0</sup>         | 2.6x10 <sup>-3</sup>              | 2.7x10 <sup>2</sup> |                              | 301             | 93                   |
|                              | <i>Rhizophora mucronata</i>     | 7.0x10 <sup>0</sup>         | 5.0x10 <sup>-4</sup>              | 1.4x10 <sup>3</sup> |                              | 301             | 93                   |
|                              | <i>Rhizophora mucronata</i>     | 7.0x10 <sup>0</sup>         | 5.3x10 <sup>-4</sup>              | 1.3x10 <sup>3</sup> |                              | 301             | 93                   |
|                              | <i>Sonneratia caseolaris</i>    | 6.5x10 <sup>0</sup>         | 2.4x10 <sup>-5</sup>              | 2.8x10 <sup>4</sup> |                              | 301             | 96                   |
|                              | <i>Sonneratia caseolaris</i>    | 6.4x10 <sup>-1</sup>        | 2.8x10 <sup>-3</sup>              | 2.5x10 <sup>2</sup> |                              | 301             | 93                   |
|                              | <i>Sonneratia caseolaris</i>    | 6.4x10 <sup>-1</sup>        | 8.9x10 <sup>-3</sup>              | 7.8x10 <sup>1</sup> |                              | 301             | 93                   |
| <i>Sonneratia caseolaris</i> | 6.4x10 <sup>-1</sup>            | 1.2x10 <sup>-2</sup>        | 5.7x10 <sup>1</sup>               |                     | 301                          | 93              |                      |
| <i>Sonneratia caseolaris</i> | 6.4x10 <sup>-1</sup>            | 4.7x10 <sup>-3</sup>        | 1.5x10 <sup>2</sup>               |                     | 301                          | 93              |                      |
| <i>Sonneratia caseolaris</i> | 6.4x10 <sup>-1</sup>            | 1.4x10 <sup>-2</sup>        | 5.1x10 <sup>1</sup>               |                     | 301                          | 93              |                      |
| <i>Sonneratia caseolaris</i> | 6.4x10 <sup>-1</sup>            | 6.4x10 <sup>-3</sup>        | 1.1x10 <sup>2</sup>               |                     | 301                          | 93              |                      |
| Trees                        | <i>Abies lasiocarpa</i>         |                             | 3.1x10 <sup>-5</sup>              | 2.2x10 <sup>4</sup> |                              | 284             | 99                   |
|                              | <i>Acacia burkittii</i>         |                             | 2.4x10 <sup>-5</sup>              | 2.9x10 <sup>4</sup> |                              | 290             | 100                  |
|                              | <i>Acacia burkittii</i>         |                             | 1.8x10 <sup>-5</sup>              | 3.9x10 <sup>4</sup> |                              | 290             | 100                  |

**Table 2. (cont).**

| Plant type | Species (or community)         | Individual plant mass (gDW) | Mortality rate (d <sup>-1</sup> ) | Half-life (d)       | Birthrate (d <sup>-1</sup> ) | Temperature (K) | Source<br>Plant data |
|------------|--------------------------------|-----------------------------|-----------------------------------|---------------------|------------------------------|-----------------|----------------------|
| Trees      | <i>Acacia burkittii</i>        |                             | 2.3x10 <sup>-5</sup>              | 3.1x10 <sup>4</sup> |                              | 290             | 100                  |
|            | <i>Acacia burkittii</i>        |                             | 1.8x10 <sup>-5</sup>              | 4.0x10 <sup>4</sup> |                              | 290             | 100                  |
|            | <i>Acacia burkittii</i>        |                             | 1.9x10 <sup>-5</sup>              | 3.6x10 <sup>4</sup> |                              | 290             | 100                  |
|            | <i>Acacia burkittii</i>        |                             | 3.2x10 <sup>-5</sup>              | 2.2x10 <sup>4</sup> |                              | 292             | 100                  |
|            | <i>Acacia victoriae</i>        | 4.0x10 <sup>2</sup>         | 7.7x10 <sup>-5</sup>              | 9.0x10 <sup>3</sup> |                              | 292             | 101                  |
|            | <i>Acacia victoriae</i>        | 5.1x10 <sup>2</sup>         | 2.0x10 <sup>-4</sup>              | 3.5x10 <sup>3</sup> |                              | 292             | 101                  |
|            | <i>Acacia victoriae</i>        | 5.4x10 <sup>2</sup>         | 3.5x10 <sup>-4</sup>              | 2.0x10 <sup>3</sup> |                              | 292             | 101                  |
|            | <i>Acacia victoriae</i>        | 4.0x10 <sup>2</sup>         | 5.5x10 <sup>-4</sup>              | 1.2x10 <sup>3</sup> |                              | 292             | 101                  |
|            | <i>Acacia victoriae</i>        | 4.6x10 <sup>2</sup>         | 3.7x10 <sup>-4</sup>              | 1.9x10 <sup>3</sup> |                              | 292             | 101                  |
|            | <i>Accer saccharum</i>         |                             | 2.6x10 <sup>-3</sup>              | 2.7x10 <sup>2</sup> |                              | 280             | 102                  |
|            | <i>Accer saccharum</i>         |                             | 2.6x10 <sup>-3</sup>              | 2.7x10 <sup>2</sup> |                              | 280             | 102                  |
|            | <i>Accer saccharum</i>         |                             | 2.9x10 <sup>-3</sup>              | 2.4x10 <sup>2</sup> |                              | 280             | 102                  |
|            | <i>Accer saccharum</i>         |                             | 1.9x10 <sup>-3</sup>              | 3.6x10 <sup>2</sup> |                              | 280             | 102                  |
|            | <i>Accer saccharum</i>         | 2.1 x10 <sup>6</sup>        | 9.2x10 <sup>-6</sup>              | 7.6x10 <sup>4</sup> |                              | 284             | 103                  |
|            | <i>Acer rubrum</i>             |                             | 2.9x10 <sup>-5</sup>              | 2.4x10 <sup>4</sup> |                              | 282             | 104                  |
|            | <i>Acer saccharum</i>          |                             | 1.8x10 <sup>-5</sup>              | 3.9x10 <sup>4</sup> |                              | 282             | 104                  |
|            | <i>Aesculus octandra</i>       | 1.8 x10 <sup>6</sup>        | 2.8x10 <sup>-6</sup>              | 2.5x10 <sup>5</sup> |                              | 284             | 103                  |
|            | <i>Alchornea costaricensis</i> | 5.1 x10 <sup>5</sup>        | 8.3x10 <sup>-5</sup>              | 8.3x10 <sup>3</sup> |                              | 301             | 105                  |
|            | <i>Alchornea latifolia</i>     |                             | 3.3x10 <sup>-5</sup>              | 2.1x10 <sup>4</sup> | 3.3x10 <sup>-5</sup>         | 292             | 106                  |
|            | <i>Alseis blackiana</i>        | 4.1 x10 <sup>5</sup>        | 1.7x10 <sup>-5</sup>              | 4.2x10 <sup>4</sup> |                              | 301             | 105                  |
|            | <i>Betula alleghaniensis</i>   |                             | 4.9x10 <sup>-5</sup>              | 1.4x10 <sup>4</sup> |                              | 282             | 104                  |
|            | <i>Betula alleghaniensis</i>   | 11 x10 <sup>5</sup>         | 1.7x10 <sup>-5</sup>              | 4.1x10 <sup>4</sup> |                              | 284             | 103                  |
|            | <i>Betula lenta</i>            |                             | 4.4x10 <sup>-5</sup>              | 1.6x10 <sup>4</sup> |                              | 282             | 104                  |
|            | <i>Camelia japonica</i>        | 2.5x10 <sup>5</sup>         | 1.5x10 <sup>-5</sup>              | 4.6x10 <sup>4</sup> | 1.6x10 <sup>-5</sup>         | 292             | 107                  |
|            | <i>Camelia japonica</i>        | 5.1x10 <sup>5</sup>         | 2.4x10 <sup>-5</sup>              | 2.9x10 <sup>4</sup> |                              | 292             | 107                  |

**Table 2. (cont).**

| Plant type | Species (or community)           | Individual plant mass (gDW) | Mortality rate (d <sup>-1</sup> ) | Half-life (d)       | Birthrate (d <sup>-1</sup> ) | Temperature (K) | Source<br>Plant data |
|------------|----------------------------------|-----------------------------|-----------------------------------|---------------------|------------------------------|-----------------|----------------------|
| Trees      | <i>Camelia sasnqua</i>           | 2.2x10 <sup>5</sup>         | 1.4x10 <sup>-5</sup>              | 5.0x10 <sup>4</sup> | 3.0x10 <sup>-5</sup>         | 292             | 107                  |
|            | <i>Camelia sasnqua</i>           | 5.6x10 <sup>5</sup>         | 3.4x10 <sup>-5</sup>              | 2.0x10 <sup>4</sup> |                              | 292             | 107                  |
|            | <i>Camellia japonica</i>         | 5.0 x10 <sup>5</sup>        | 2.1x10 <sup>-5</sup>              | 3.4x10 <sup>4</sup> |                              | 292             | 108                  |
|            | <i>Camellia sasanqua</i>         | 5.3 x10 <sup>5</sup>        | 3.2x10 <sup>-5</sup>              | 2.2x10 <sup>4</sup> |                              | 292             | 108                  |
|            | <i>Cecropia obtusifolia</i>      |                             | 2.8x10 <sup>-3</sup>              | 2.5x10 <sup>2</sup> |                              | 298             | 109                  |
|            | <i>Cecropia obtusifolia</i>      |                             | 2.4x10 <sup>-3</sup>              | 2.9x10 <sup>2</sup> |                              | 298             | 109                  |
|            | <i>Cecropia obtusifolia</i>      |                             | 1.6x10 <sup>-3</sup>              | 4.3x10 <sup>2</sup> |                              | 298             | 109                  |
|            | <i>Cecropia obtusifolia</i>      | 9.6 x10 <sup>4</sup>        | 6.5x10 <sup>-4</sup>              | 1.1x10 <sup>3</sup> |                              | 298             | 109                  |
|            | <i>Cecropia obtusifolia</i>      | 6.2 x10 <sup>4</sup>        | 1.5x10 <sup>-4</sup>              | 4.7x10 <sup>3</sup> |                              | 298             | 109                  |
|            | <i>Cecropia obtusifolia</i>      | 2.2 x10 <sup>5</sup>        | 8.9x10 <sup>-5</sup>              | 7.8x10 <sup>3</sup> |                              | 298             | 109                  |
|            | <i>Cecropia obtusifolia</i>      | 5.0 x10 <sup>5</sup>        | 1.8x10 <sup>-4</sup>              | 4.0x10 <sup>3</sup> |                              | 298             | 109                  |
|            | <i>Cecropia obtusifolia</i>      | 9.4 x10 <sup>5</sup>        | 5.6x10 <sup>-4</sup>              | 1.2x10 <sup>3</sup> |                              | 298             | 109                  |
|            | <i>Cephalanthus occidentalis</i> | 1.6x10 <sup>1</sup>         | 2.3x10 <sup>-3</sup>              | 3.0x10 <sup>2</sup> |                              | 296             | 110                  |
|            | <i>Chaetocarpus globosus</i>     |                             | 8.3x10 <sup>-6</sup>              | 8.3x10 <sup>4</sup> | 1.4x10 <sup>-5</sup>         | 292             | 106                  |
|            | <i>Clethra occidentalis</i>      | 4.0 x10 <sup>4</sup>        | 1.7x10 <sup>-5</sup>              | 4.2x10 <sup>4</sup> | 5.6x10 <sup>-6</sup>         | 292             | 106                  |
|            | <i>Cleyera japonica</i>          | 6.3 x10 <sup>5</sup>        | 2.5x10 <sup>-5</sup>              | 2.8x10 <sup>4</sup> |                              | 292             | 108                  |
|            | <i>Cleyera japonica</i>          | 5.9x10 <sup>5</sup>         | 3.1x10 <sup>-5</sup>              | 2.2x10 <sup>4</sup> | 2.5x10 <sup>-5</sup>         | 292             | 107                  |
|            | <i>Cleyera japonica</i>          | 4.2x10 <sup>5</sup>         | 1.3x10 <sup>-5</sup>              | 5.2x10 <sup>4</sup> |                              | 292             | 107                  |
|            | <i>Clusia havetioides</i>        |                             | 5.6x10 <sup>-6</sup>              | 1.2x10 <sup>5</sup> | 4.7x10 <sup>-5</sup>         | 292             | 108                  |
|            | <i>Cordia alliodora</i>          | 6.2 x10 <sup>5</sup>        | 1.3x10 <sup>-4</sup>              | 5.5x10 <sup>3</sup> |                              | 301             | 105                  |
|            | <i>Cyathea pubescens</i>         |                             | 4.4x10 <sup>-5</sup>              | 1.6x10 <sup>4</sup> | 1.1x10 <sup>-5</sup>         | 292             | 106                  |
|            | <i>Cyrilla racemiflora</i>       |                             | 2.8x10 <sup>-5</sup>              | 2.5x10 <sup>4</sup> | 1.1x10 <sup>-5</sup>         | 292             | 106                  |
|            | <i>Dacrycarpus dacrydioides</i>  |                             | 6.4x10 <sup>-6</sup>              | 1.1x10 <sup>5</sup> |                              | 285             | 111                  |
|            | <i>Dendropanax pendulus</i>      |                             | 1.7x10 <sup>-5</sup>              | 4.2x10 <sup>4</sup> | 5.0x10 <sup>-5</sup>         | 292             | 106                  |
|            | <i>Desmopsis juveniles</i>       |                             | 5.8x10 <sup>-5</sup>              | 1.2x10 <sup>4</sup> |                              | 301             | 112                  |
|            | <i>Desmopsis juveniles</i>       |                             | 8.6x10 <sup>-5</sup>              | 8.0x10 <sup>3</sup> | 1.3x10 <sup>-4</sup>         | 301             | 112                  |

**Table 2. (cont).**

| Plant type | Species (or community)         | Individual plant mass (gDW) | Mortality rate (d <sup>-1</sup> ) | Half-life (d)       | Birthrate (d <sup>-1</sup> ) | Temperature (K) | Source<br>Plant data |
|------------|--------------------------------|-----------------------------|-----------------------------------|---------------------|------------------------------|-----------------|----------------------|
| Trees      | <i>Distylym racemosum</i>      | 11 x10 <sup>6</sup>         | 2.2x10 <sup>-5</sup>              | 3.1x10 <sup>4</sup> |                              | 292             | 108                  |
|            | <i>Distylium racemosum</i>     | 6.9 x10 <sup>6</sup>        | 2.1x10 <sup>-5</sup>              | 3.3x10 <sup>4</sup> | 1.9x10 <sup>-5</sup>         | 292             | 107                  |
|            | <i>Distylium racemosum</i>     | 8.3x10 <sup>6</sup>         | 2.7x10 <sup>-5</sup>              | 2.6x10 <sup>4</sup> |                              | 292             | 107                  |
|            | <i>Drymis winteri</i>          | 1.7 x10 <sup>4</sup>        | 2.7x10 <sup>-5</sup>              | 2.5x10 <sup>4</sup> |                              |                 | 112                  |
|            | <i>Drymis winteri</i>          | 9.5 x10 <sup>3</sup>        | 2.7x10 <sup>-05</sup>             | 2.5x10 <sup>4</sup> |                              |                 | 112                  |
|            | <i>Dryobalanops lanceolata</i> | 2.2 x10 <sup>5</sup>        | 2.9x10 <sup>-5</sup>              | 2.4x10 <sup>4</sup> | 1.7x10 <sup>-5</sup>         | 299             | 113                  |
|            | <i>Entandrophragma utile</i>   |                             | 7.2x10 <sup>-4</sup>              | 9.6x10 <sup>2</sup> |                              | 299             | 114                  |
|            | <i>Entandrophragma utile</i>   |                             | 2.2x10 <sup>-3</sup>              | 3.2x10 <sup>2</sup> |                              | 299             | 114                  |
|            | <i>Entandrophragma utile</i>   |                             | 3.6x10 <sup>-3</sup>              | 1.9x10 <sup>2</sup> |                              | 299             | 114                  |
|            | <i>Eugenia virgultosa</i>      |                             | 8.3x10 <sup>-6</sup>              | 8.3x10 <sup>4</sup> | 6.4x10 <sup>-5</sup>         | 292             | 106                  |
|            | <i>Eurya japonica</i>          | 9.0x10 <sup>4</sup>         | 6.1x10 <sup>-5</sup>              | 1.1x10 <sup>4</sup> |                              | 292             | 108                  |
|            | <i>Eurya japonica</i>          | 9.4x10 <sup>4</sup>         | 5.5x10 <sup>-5</sup>              | 1.3x10 <sup>4</sup> | 7.0x10 <sup>-5</sup>         | 292             | 107                  |
|            | <i>Eurya japonica</i>          | 5.2x10 <sup>4</sup>         | 8.3x10 <sup>-5</sup>              | 8.4x10 <sup>3</sup> |                              | 292             | 107                  |
|            | <i>Fagus grandifolia</i>       |                             | 2.7x10 <sup>-5</sup>              | 2.6x10 <sup>4</sup> |                              | 282             | 104                  |
|            | <i>Fagus grandifolia</i>       | 10 x10 <sup>5</sup>         | 3.3x10 <sup>-5</sup>              | 2.1x10 <sup>4</sup> |                              | 284             | 103                  |
|            | <i>Faramea juveniles</i>       |                             | 3.0x10 <sup>-5</sup>              | 2.3x10 <sup>4</sup> |                              | 301             | 112                  |
|            | <i>Faramea juveniles</i>       |                             | 2.8x10 <sup>-5</sup>              | 2.4x10 <sup>4</sup> | 9.2x10 <sup>-5</sup>         | 301             | 112                  |
|            | <i>Fraxinus americana</i>      |                             | 1.8x10 <sup>-5</sup>              | 3.9x10 <sup>4</sup> |                              | 282             | 104                  |
|            | <i>Guarea glabra</i>           | 4.0 x10 <sup>5</sup>        | 2.8x10 <sup>-5</sup>              | 2.5x10 <sup>4</sup> |                              | 301             | 105                  |
|            | <i>Guarea glabra</i>           |                             | 8.3x10 <sup>-6</sup>              | 8.3x10 <sup>4</sup> | 8.0x10 <sup>-5</sup>         | 292             | 106                  |
|            | <i>Gutteria dumetorum</i>      | 1.2 x10 <sup>6</sup>        | 1.4x10 <sup>-5</sup>              | 5.0x10 <sup>4</sup> |                              | 301             | 105                  |
|            | <i>Gustavia superba</i>        | 2.4 x10 <sup>5</sup>        | 8.3x10 <sup>-6</sup>              | 8.3x10 <sup>4</sup> |                              | 301             | 105                  |
|            | <i>Halesia carolina</i>        | 8.9 x10 <sup>5</sup>        | 1.4x10 <sup>-5</sup>              | 5.1x10 <sup>4</sup> |                              | 284             | 106                  |
|            | <i>Hasseltia floribunda</i>    | 2.2x10 <sup>5</sup>         | 7.0x10 <sup>-5</sup>              | 1.0x10 <sup>4</sup> |                              | 301             | 105                  |
|            | <i>Hedyosmum arborescens</i>   | 1.1x10 <sup>4</sup>         | 4.4x10 <sup>-5</sup>              | 1.6x10 <sup>4</sup> | 5.8x10 <sup>-5</sup>         | 292             | 106                  |
|            | <i>Heisterai concinna</i>      | 1.8x10 <sup>5</sup>         | 3.1x10 <sup>-5</sup>              | 2.3x10 <sup>4</sup> |                              | 301             | 105                  |
|            | <i>Hirtella triandra</i>       | 2.0x10 <sup>5</sup>         | 3.1x10 <sup>-5</sup>              | 2.3x10 <sup>4</sup> |                              | 301             | 105                  |



**Table 2. (cont).**

| Plant type | Species (or community)      | Individual plant mass (gDW) | Mortality rate (d <sup>-1</sup> ) | Half-life (d)       | Birthrate (d <sup>-1</sup> ) | Temperature (K) | Source<br>Plant data |
|------------|-----------------------------|-----------------------------|-----------------------------------|---------------------|------------------------------|-----------------|----------------------|
| Trees      | <i>Hura crepitans</i>       | 1.6x10 <sup>6</sup>         | 1.4x10 <sup>-5</sup>              | 5.0x10 <sup>4</sup> |                              | 301             | 105                  |
|            | <i>Ilex macfadyenii</i>     |                             | 8.1x10 <sup>-5</sup>              | 8.6x10 <sup>3</sup> | 6.7x10 <sup>-5</sup>         | 292             | 106                  |
|            | <i>Illicium anisatum</i>    | 4.8x10 <sup>5</sup>         | 5.5x10 <sup>-5</sup>              | 1.2x10 <sup>4</sup> |                              | 292             | 108                  |
|            | <i>Illicium anisatum</i>    | 3.2x10 <sup>5</sup>         | 4.9x10 <sup>-5</sup>              | 1.4x10 <sup>4</sup> | 6.0x10 <sup>-5</sup>         | 292             | 107                  |
|            | <i>Illicium anisatum</i>    | 3.9x10 <sup>5</sup>         | 6.5x10 <sup>-5</sup>              | 1.1x10 <sup>4</sup> |                              | 292             | 107                  |
|            | <i>Jacaranda copaia</i>     | 2.2 x10 <sup>6</sup>        | 1.6x10 <sup>-4</sup>              | 4.2x10 <sup>3</sup> |                              | 301             | 105                  |
|            | <i>Litsea acuminata</i>     | 2.5 x10 <sup>6</sup>        | 5.1x10 <sup>-5</sup>              | 1.4x10 <sup>4</sup> |                              | 292             | 108                  |
|            | <i>Litsea acuminata</i>     | 2.0x10 <sup>6</sup>         | 5.6x10 <sup>-5</sup>              | 1.2x10 <sup>4</sup> | 8.7x10 <sup>-5</sup>         | 292             | 107                  |
|            | <i>Litsea acuminata</i>     | 2.3x10 <sup>6</sup>         | 5.1x10 <sup>-5</sup>              | 1.4x10 <sup>4</sup> |                              | 292             | 107                  |
|            | <i>Lyonia octandra</i>      | 1.1x10 <sup>4</sup>         | 1.7x10 <sup>-5</sup>              | 4.2x10 <sup>4</sup> | 1.7x10 <sup>-5</sup>         | 292             | 106                  |
|            | <i>Macaranga beccariana</i> |                             | 7.2x10 <sup>-6</sup>              | 9.6x10 <sup>4</sup> |                              | 300             | 115                  |
|            | <i>Macaranga beccariana</i> |                             | 4.4x10 <sup>-6</sup>              | 1.6x10 <sup>5</sup> |                              | 300             | 115                  |
|            | <i>Macaranga beccariana</i> |                             | 3.1x10 <sup>-6</sup>              | 2.3x10 <sup>5</sup> |                              | 300             | 115                  |
|            | <i>Macaranga beccariana</i> | 4.1x10 <sup>5</sup>         | 4.2x10 <sup>-6</sup>              | 1.7x10 <sup>5</sup> |                              | 300             | 115                  |
|            | <i>Macaranga gigantea</i>   |                             | 5.3x10 <sup>-6</sup>              | 1.3x10 <sup>5</sup> |                              | 300             | 115                  |
|            | <i>Macaranga gigantea</i>   |                             | 5.6x10 <sup>-7</sup>              | 1.2x10 <sup>6</sup> |                              | 300             | 115                  |
|            | <i>Macaranga gigantea</i>   | 1.9x10 <sup>6</sup>         | 1.4x10 <sup>-6</sup>              | 5.0x10 <sup>5</sup> |                              | 300             | 115                  |
|            | <i>Macaranga hosei</i>      |                             | 8.3x10 <sup>-6</sup>              | 8.3x10 <sup>4</sup> |                              | 300             | 115                  |
|            | <i>Macaranga hosei</i>      |                             | 1.9x10 <sup>-6</sup>              | 3.6x10 <sup>5</sup> |                              | 300             | 115                  |
|            | <i>Macaranga hosei</i>      |                             | 4.2x10 <sup>-6</sup>              | 1.7x10 <sup>5</sup> |                              | 300             | 115                  |
|            | <i>Macaranga hosei</i>      | 2.3x10 <sup>6</sup>         | 2.5x10 <sup>-6</sup>              | 2.8x10 <sup>5</sup> |                              | 300             | 115                  |
|            | <i>Macaranga hullettii</i>  |                             | 5.6x10 <sup>-7</sup>              | 1.2x10 <sup>6</sup> |                              | 300             | 115                  |
|            | <i>Macaranga hullettii</i>  |                             | 5.6x10 <sup>-7</sup>              | 1.2x10 <sup>6</sup> |                              | 300             | 115                  |
|            | <i>Macaranga hullettii</i>  |                             | 8.3x10 <sup>-7</sup>              | 8.3x10 <sup>5</sup> |                              | 300             | 115                  |
|            | <i>Macaranga hullettii</i>  | 4.6x10 <sup>5</sup>         | 1.4x10 <sup>-6</sup>              | 5.0x10 <sup>5</sup> |                              | 300             | 115                  |
|            | <i>Macaranga hypoleuca</i>  |                             | 6.4x10 <sup>-6</sup>              | 1.1x10 <sup>5</sup> |                              | 300             | 115                  |
|            | <i>Macaranga hypoleuca</i>  |                             | 1.1x10 <sup>-6</sup>              | 6.2x10 <sup>5</sup> |                              | 300             | 115                  |

**Table 2. (cont).**

| Plant type | Species (or community)        | Individual plant mass (gDW) | Mortality rate (d <sup>-1</sup> ) | Half-life (d)       | Birthrate (d <sup>-1</sup> ) | Temperature (K) | Source<br>Plant data |
|------------|-------------------------------|-----------------------------|-----------------------------------|---------------------|------------------------------|-----------------|----------------------|
| Trees      | <i>Macaranga hypoleuca</i>    |                             | 3.6x10 <sup>-6</sup>              | 1.9x10 <sup>5</sup> |                              | 300             | 115                  |
|            | <i>Macaranga hypoleuca</i>    | 8.8x10 <sup>5</sup>         | 8.3x10 <sup>-7</sup>              | 8.3x10 <sup>5</sup> |                              | 300             | 115                  |
|            | <i>Macaranga lamellata</i>    |                             | 2.8x10 <sup>-7</sup>              | 2.5x10 <sup>6</sup> |                              | 300             | 115                  |
|            | <i>Macaranga lamellata</i>    |                             | 2.8x10 <sup>-7</sup>              | 2.5x10 <sup>6</sup> |                              | 300             | 115                  |
|            | <i>Macaranga lamellata</i>    | 2.8x10 <sup>5</sup>         | 5.6x10 <sup>-7</sup>              | 1.2x10 <sup>6</sup> |                              | 300             | 115                  |
|            | <i>Macaranga trachyphylla</i> |                             | 3.9x10 <sup>-6</sup>              | 1.8x10 <sup>5</sup> |                              | 300             | 115                  |
|            | <i>Macaranga trachyphylla</i> |                             | 1.7x10 <sup>-6</sup>              | 4.2x10 <sup>5</sup> |                              | 300             | 115                  |
|            | <i>Macaranga trachyphylla</i> |                             | 8.3x10 <sup>-7</sup>              | 8.3x10 <sup>5</sup> |                              | 300             | 115                  |
|            | <i>Macaranga trachyphylla</i> | 7.8x10 <sup>5</sup>         | 2.2x10 <sup>-6</sup>              | 3.1x10 <sup>5</sup> |                              | 300             | 115                  |
|            | <i>Macaranga triloba</i>      |                             | 1.1x10 <sup>-5</sup>              | 6.4x10 <sup>4</sup> |                              | 300             | 115                  |
|            | <i>Macaranga triloba</i>      |                             | 1.7x10 <sup>-6</sup>              | 4.2x10 <sup>5</sup> |                              | 300             | 115                  |
|            | <i>Macaranga triloba</i>      |                             | 1.1x10 <sup>-6</sup>              | 6.2x10 <sup>5</sup> |                              | 300             | 115                  |
|            | <i>Macaranga triloba</i>      | 8.7x10 <sup>5</sup>         | 8.3x10 <sup>-7</sup>              | 8.3x10 <sup>5</sup> |                              | 300             | 115                  |
|            | <i>Macaranga winkleri</i>     |                             | 5.6x10 <sup>-6</sup>              | 1.2x10 <sup>5</sup> |                              | 300             | 115                  |
|            | <i>Macaranga winkleri</i>     |                             | 2.8x10 <sup>-6</sup>              | 2.5x10 <sup>5</sup> |                              | 300             | 115                  |
|            | <i>Macaranga winkleri</i>     |                             | 3.6x10 <sup>-6</sup>              | 1.9x10 <sup>5</sup> |                              | 300             | 115                  |
|            | <i>Macaranga winkleri</i>     | 7.8x10 <sup>5</sup>         | 7.0x10 <sup>-6</sup>              | 1.0x10 <sup>5</sup> |                              | 300             | 115                  |
|            | <i>Mecranium purpurascens</i> |                             | 1.2x10 <sup>-4</sup>              | 5.7x10 <sup>3</sup> | 1.1x10 <sup>-4</sup>         | 292             | 106                  |
|            | <i>Meriania purpurea</i>      |                             | 3.6x10 <sup>-5</sup>              | 1.9x10 <sup>4</sup> | 2.5x10 <sup>-5</sup>         | 292             | 106                  |
|            | <i>Myrsine seguinii</i>       | 2.9x10 <sup>5</sup>         | 1.1x10 <sup>-5</sup>              | 6.3x10 <sup>4</sup> |                              | 292             | 108                  |
|            | <i>Myrsine seguinii</i>       | 3.2x10 <sup>5</sup>         | 2.2x10 <sup>-5</sup>              | 3.1x10 <sup>4</sup> | 7.0x10 <sup>-5</sup>         | 292             | 107                  |
|            | <i>Myrsine seguinii</i>       | 4.5x10 <sup>4</sup>         | 4.8x10 <sup>-6</sup>              | 1.5x10 <sup>5</sup> |                              | 292             | 107                  |
|            | <i>Neolitsea aciculata</i>    | 1.6x10 <sup>6</sup>         | 6.3x10 <sup>-5</sup>              | 1.1x10 <sup>4</sup> |                              | 292             | 108                  |
|            | <i>Neolitsea aciculata</i>    | 1.5x10 <sup>6</sup>         | 5.3x10 <sup>-5</sup>              | 1.3x10 <sup>4</sup> | 6.4x10 <sup>-5</sup>         | 292             | 107                  |
|            | <i>Neolitsea aciculata</i>    | 9.8x10 <sup>5</sup>         | 6.1x10 <sup>-5</sup>              | 1.1x10 <sup>4</sup> |                              | 292             | 107                  |
|            | <i>Nothofagus betuloides</i>  | 7.5x10 <sup>5</sup>         | 1.1x10 <sup>-5</sup>              | 6.0x10 <sup>4</sup> |                              |                 | 112                  |
|            | <i>Nothofagus betuloides</i>  | 2.7x10 <sup>5</sup>         | 1.0x10 <sup>-5</sup>              | 6.9x10 <sup>4</sup> |                              |                 | 112                  |

**Table 2. (cont).**

| Plant type | Species (or community)         | Individual plant mass (gDW) | Mortality rate (d <sup>-1</sup> ) | Half-life (d)       | Birthrate (d <sup>-1</sup> ) | Temperature (K) | Source<br>Plant data |
|------------|--------------------------------|-----------------------------|-----------------------------------|---------------------|------------------------------|-----------------|----------------------|
| Trees      | <i>Nothofagus betuloides</i>   | 1.8x10 <sup>4</sup>         | 2.7x10 <sup>-5</sup>              | 2.6x10 <sup>4</sup> |                              |                 | 112                  |
|            | <i>Nothofagus betuloides</i>   | 2.7x10 <sup>5</sup>         | 1.3x10 <sup>-5</sup>              | 5.4x10 <sup>4</sup> |                              |                 | 112                  |
|            | <i>Nothofagus betuloides</i>   | 6.2x10 <sup>4</sup>         | 1.5x10 <sup>-5</sup>              | 4.7x10 <sup>4</sup> |                              |                 | 112                  |
|            | <i>Nothofagus fusca</i>        |                             | 1.3x10 <sup>-5</sup>              | 5.4x10 <sup>4</sup> |                              | 285             | 111                  |
|            | <i>Nothofagus pumilio</i>      | 3.2x10 <sup>5</sup>         | 1.5x10 <sup>-5</sup>              | 4.7x10 <sup>4</sup> |                              |                 | 112                  |
|            | <i>Nothofagus pumilio</i>      | 2.4x10 <sup>5</sup>         | 1.4x10 <sup>-5</sup>              | 4.8x10 <sup>4</sup> |                              |                 | 112                  |
|            | <i>Nyssa aquatica</i>          | 1.3x10 <sup>1</sup>         | 5.2x10 <sup>-3</sup>              | 1.3x10 <sup>2</sup> |                              |                 | 110                  |
|            | <i>Ormosia coccinea</i>        | 4.7x10 <sup>5</sup>         | 1.2x10 <sup>-4</sup>              | 5.8x10 <sup>3</sup> |                              | 301             | 105                  |
|            | <i>Ostrya virginiana</i>       |                             | 5.2x10 <sup>-5</sup>              | 1.3x10 <sup>4</sup> |                              | 282             | 104                  |
|            | <i>Parashorea macrophylla</i>  | 2.4x10 <sup>5</sup>         | 7.1x10 <sup>-5</sup>              | 9.8x10 <sup>3</sup> | 1.5x10 <sup>-5</sup>         | 299             | 113                  |
|            | <i>Picea engelmannii</i>       | 1.0x10 <sup>4</sup>         | 2.4x10 <sup>-5</sup>              | 2.9x10 <sup>4</sup> |                              | 284             | 99                   |
|            | <i>Picea mariana</i>           |                             | 2.5x10 <sup>-5</sup>              | 2.8x10 <sup>4</sup> |                              | 266             | 116                  |
|            | <i>Picea mariana</i>           |                             | 5.8x10 <sup>-6</sup>              | 1.2x10 <sup>5</sup> |                              | 266             | 116                  |
|            | <i>Pinus sylvestris</i>        | 3.1x10 <sup>4</sup>         | 4.8x10 <sup>-5</sup>              | 1.4x10 <sup>4</sup> |                              | 282             | 117                  |
|            | <i>Podocarpus nagi</i>         | 12 x10 <sup>5</sup>         | 6.1x10 <sup>-5</sup>              | 1.1x10 <sup>4</sup> |                              | 292             | 108                  |
|            | <i>Podocarpus nagi</i>         | 2.4x10 <sup>5</sup>         | 6.1x10 <sup>-5</sup>              | 1.1x10 <sup>4</sup> | 9.1x10 <sup>-5</sup>         | 292             | 107                  |
|            | <i>Podocarpus nagi</i>         | 1.2x10 <sup>6</sup>         | 5.2x10 <sup>-5</sup>              | 1.3x10 <sup>4</sup> |                              | 292             | 107                  |
|            | <i>Podocarpus urbanii</i>      | 1.1x10 <sup>4</sup>         | 1.7x10 <sup>-5</sup>              | 4.2x10 <sup>4</sup> | 2.8x10 <sup>-5</sup>         | 292             | 106                  |
|            | <i>Populus grandidentata</i>   |                             | 3.9x10 <sup>-5</sup>              | 1.8x10 <sup>4</sup> |                              | 282             | 104                  |
|            | <i>Populus tremuloides</i>     | 2.5x10 <sup>2</sup>         | 9.1x10 <sup>-4</sup>              | 7.6x10 <sup>2</sup> |                              | 280             | 118                  |
|            | <i>Populus tremuloides</i>     | 4.4x10 <sup>2</sup>         | 9.5x10 <sup>-4</sup>              | 7.3x10 <sup>2</sup> |                              | 280             | 118                  |
|            | <i>Poulsenia armata</i>        | 11 x10 <sup>5</sup>         | 9.7x10 <sup>-5</sup>              | 7.1x10 <sup>3</sup> |                              | 301             | 105                  |
|            | <i>Psychotria corymbosa</i>    |                             | 1.1x10 <sup>-4</sup>              | 6.6x10 <sup>3</sup> | 1.5x10 <sup>-4</sup>         | 292             | 106                  |
|            | <i>Pterocarpus rohrii</i>      | 9.4x10 <sup>5</sup>         | 1.7x10 <sup>-4</sup>              | 4.1x10 <sup>3</sup> |                              | 301             | 105                  |
|            | <i>Quararibea asterolepsis</i> | 2.8x10 <sup>6</sup>         | 1.7x10 <sup>-5</sup>              | 4.2x10 <sup>4</sup> |                              | 301             | 105                  |
|            | <i>Quercus ssp.</i>            | 5.0x10 <sup>5</sup>         | 1.3x10 <sup>-5</sup>              | 5.2x10 <sup>4</sup> |                              | 289             | 119                  |
|            | <i>Quercus ssp.</i>            | 5.0x10 <sup>5</sup>         | 1.4x10 <sup>-5</sup>              | 5.1x10 <sup>4</sup> |                              | 289             | 119                  |

**Table 2. (cont).**

| Plant type | Species (or community)       | Individual plant mass (gDW) | Mortality rate (d <sup>-1</sup> ) | Half-life (d)       | Birthrate (d <sup>-1</sup> ) | Temperature (K) | Source<br>Plant data |
|------------|------------------------------|-----------------------------|-----------------------------------|---------------------|------------------------------|-----------------|----------------------|
| Trees      | <i>Quercus ssp.</i>          | 5.0x10 <sup>5</sup>         | 1.7x10 <sup>-5</sup>              | 4.1x10 <sup>4</sup> |                              | 287             | 119                  |
|            | <i>Quercus ssp.</i>          | 5.0x10 <sup>5</sup>         | 2.4x10 <sup>-5</sup>              | 2.9x10 <sup>4</sup> |                              | 287             | 119                  |
|            | <i>Quercus ssp.</i>          | 5.0x10 <sup>5</sup>         | 1.1x10 <sup>-5</sup>              | 6.6x10 <sup>4</sup> |                              | 283             | 119                  |
|            | <i>Quercus ssp.</i>          | 5.0x10 <sup>5</sup>         | 3.0x10 <sup>-5</sup>              | 2.3x10 <sup>4</sup> |                              | 283             | 119                  |
|            | <i>Quercus ssp.</i>          | 5.0x10 <sup>5</sup>         | 1.8x10 <sup>-5</sup>              | 4.0x10 <sup>4</sup> |                              | 286             | 119                  |
|            | <i>Quercus ssp.</i>          | 5.0x10 <sup>5</sup>         | 1.9x10 <sup>-5</sup>              | 3.6x10 <sup>4</sup> |                              | 286             | 119                  |
|            | <i>Quercus ssp.</i>          | 5.0x10 <sup>5</sup>         | 6.4x10 <sup>-6</sup>              | 1.1x10 <sup>5</sup> |                              |                 | 119                  |
|            | <i>Quercus ssp.</i>          | 5.0x10 <sup>5</sup>         | 2.3x10 <sup>-5</sup>              | 3.1x10 <sup>4</sup> |                              |                 | 119                  |
|            | <i>Quercus ssp.</i>          | 5.0x10 <sup>5</sup>         | 1.0x10 <sup>-5</sup>              | 6.9x10 <sup>4</sup> |                              | 284             | 119                  |
|            | <i>Quercus ssp.</i>          | 5.0x10 <sup>5</sup>         | 2.9x10 <sup>-5</sup>              | 2.4x10 <sup>4</sup> |                              | 284             | 119                  |
|            | <i>Quercus ssp.</i>          | 5.0x10 <sup>5</sup>         | 1.1x10 <sup>-5</sup>              | 6.6x10 <sup>4</sup> |                              | 285             | 119                  |
|            | <i>Quercus ssp.</i>          | 5.0x10 <sup>5</sup>         | 1.0x10 <sup>-5</sup>              | 6.9x10 <sup>4</sup> |                              | 285             | 119                  |
|            | <i>Rhododendron tashiroi</i> | 2.3x10 <sup>5</sup>         | 6.1x10 <sup>-5</sup>              | 1.1x10 <sup>4</sup> |                              | 292             | 108                  |
|            | <i>Rhododendron tashiroi</i> | 1.6x10 <sup>5</sup>         | 8.3x10 <sup>-5</sup>              | 8.3x10 <sup>3</sup> | 4.9x10 <sup>-5</sup>         | 292             | 107                  |
|            | <i>Rhododendron tashiroi</i> | 1.6x10 <sup>5</sup>         | 1.8x10 <sup>-5</sup>              | 3.8x10 <sup>4</sup> |                              | 292             | 107                  |
|            | <i>Salix nigra</i>           | 2.9x10 <sup>1</sup>         | 3.6x10 <sup>-3</sup>              | 1.9x10 <sup>2</sup> |                              |                 | 113                  |
|            | <i>Sideroxylon montanum</i>  |                             | 3.3x10 <sup>-5</sup>              | 2.1x10 <sup>4</sup> | 2.2x10 <sup>-5</sup>         | 292             | 106                  |
|            | <i>Symplocos glauca</i>      | 1.7x10 <sup>5</sup>         | 1.8x10 <sup>-4</sup>              | 3.8x10 <sup>3</sup> |                              | 292             | 108                  |
|            | <i>Symplocos glauca</i>      | 1.8x10 <sup>5</sup>         | 1.2x10 <sup>-4</sup>              | 5.8x10 <sup>3</sup> | 1.0x10 <sup>-4</sup>         | 292             | 107                  |
|            | <i>Symplocos glauca</i>      | 1.6x10 <sup>5</sup>         | 2.2x10 <sup>-4</sup>              | 3.1x10 <sup>3</sup> |                              | 292             | 107                  |
|            | <i>Symplocos prunifolia</i>  | 1.4x10 <sup>6</sup>         | 1.6x10 <sup>-4</sup>              | 4.4x10 <sup>3</sup> |                              | 292             | 108                  |
|            | <i>Symplocos prunifolia</i>  | 7.3x10 <sup>5</sup>         | 1.4x10 <sup>-4</sup>              | 4.9x10 <sup>3</sup> | 3.1x10 <sup>-4</sup>         | 292             | 107                  |
|            | <i>Symplocos prunifolia</i>  | 1.2x10 <sup>6</sup>         | 9.9x10 <sup>-5</sup>              | 7.0x10 <sup>3</sup> |                              | 292             | 107                  |
|            | <i>Symplocos tanakae</i>     | 1.1x10 <sup>5</sup>         | 1.0x10 <sup>-4</sup>              | 7.0x10 <sup>3</sup> |                              | 292             | 108                  |
|            | <i>Symplocos tanakae</i>     | 1.1x10 <sup>5</sup>         | 9.1x10 <sup>-5</sup>              | 7.6x10 <sup>3</sup> | 4.4x10 <sup>-5</sup>         | 292             | 107                  |
|            | <i>Symplocos tanakae</i>     | 1.5x10 <sup>5</sup>         | 1.3x10 <sup>-4</sup>              | 5.4x10 <sup>3</sup> |                              | 292             | 107                  |
|            | <i>Taxodium distichum</i>    | 1.1x10 <sup>1</sup>         | 2.7x10 <sup>-3</sup>              | 2.6x10 <sup>2</sup> |                              |                 | 110                  |

**Table 2. (cont).**

| Plant type                | Species (or community)         | Individual plant mass (gDW) | Mortality rate (d <sup>-1</sup> ) | Half-life (d)        | Birthrate (d <sup>-1</sup> ) | Temperature (K) | Source<br>Plant data |
|---------------------------|--------------------------------|-----------------------------|-----------------------------------|----------------------|------------------------------|-----------------|----------------------|
| Trees                     | <i>Terminalia superba</i>      |                             | 1.1×10 <sup>-3</sup>              | 6.5×10 <sup>2</sup>  |                              | 299             | 114                  |
|                           | <i>Terminalia superba</i>      |                             | 3.0×10 <sup>-3</sup>              | 2.3×10 <sup>2</sup>  |                              | 299             | 114                  |
|                           | <i>Terminalia superba</i>      |                             | 4.4×10 <sup>-3</sup>              | 1.6×10 <sup>2</sup>  |                              | 299             | 114                  |
|                           | <i>Tetragastris panamensis</i> | 7.4×10 <sup>5</sup>         | 5.3×10 <sup>-5</sup>              | 1.3×10 <sup>4</sup>  |                              | 301             | 105                  |
|                           | <i>Thuja occidentalis</i>      |                             | 2.8×10 <sup>-3</sup>              | 2.4×10 <sup>2</sup>  |                              | 280             | 102                  |
|                           | <i>Thuja occidentalis</i>      |                             | 2.7×10 <sup>-3</sup>              | 2.6×10 <sup>2</sup>  |                              | 280             | 102                  |
|                           | <i>Thuja occidentalis</i>      |                             | 1.2×10 <sup>-3</sup>              | 6.0×10 <sup>2</sup>  |                              | 280             | 102                  |
|                           | <i>Thuja occidentalis</i>      |                             | 1.9×10 <sup>-3</sup>              | 3.7×10 <sup>2</sup>  |                              | 280             | 102                  |
|                           | <i>Thuja occidentalis</i>      |                             | 8.7×10 <sup>-6</sup>              | 8.0×10 <sup>4</sup>  | 1.1×10 <sup>-5</sup>         | 281             | 120                  |
|                           | <i>Thuja occidentalis</i>      |                             | 5.6×10 <sup>-6</sup>              | 1.2×10 <sup>5</sup>  | 1.3×10 <sup>-5</sup>         | 281             | 120                  |
|                           | <i>Thuja occidentalis</i>      |                             | 9.9×10 <sup>-6</sup>              | 7.0×10 <sup>4</sup>  | 1.3×10 <sup>-5</sup>         | 281             | 120                  |
|                           | <i>Thuja occidentalis</i>      |                             | 6.1×10 <sup>-6</sup>              | 1.1×10 <sup>5</sup>  | 5.6×10 <sup>-6</sup>         | 281             | 120                  |
|                           | <i>Thuja occidentalis</i>      |                             | 3.4×10 <sup>-6</sup>              | 2.1×10 <sup>5</sup>  | 7.1×10 <sup>-6</sup>         | 281             | 120                  |
|                           | <i>Thuja occidentalis</i>      |                             | 1.0×10 <sup>-5</sup>              | 6.9×10 <sup>4</sup>  | 1.1×10 <sup>-5</sup>         | 281             | 120                  |
|                           | <i>Thuja occidentalis</i>      |                             | 8.7×10 <sup>-6</sup>              | 8.0×10 <sup>4</sup>  | 5.6×10 <sup>-6</sup>         | 281             | 120                  |
|                           | <i>Thuja occidentalis</i>      |                             | 1.3×10 <sup>-5</sup>              | 5.2×10 <sup>4</sup>  | 5.8×10 <sup>-6</sup>         | 281             | 120                  |
|                           | <i>Thuja occidentalis</i>      |                             | 9.2×10 <sup>-6</sup>              | 7.5×10 <sup>4</sup>  | 5.6×10 <sup>-6</sup>         | 281             | 120                  |
|                           | <i>Thuja occidentalis</i>      |                             | 2.5×10 <sup>-5</sup>              | 2.8×10 <sup>4</sup>  | 9.4×10 <sup>-6</sup>         | 281             | 120                  |
|                           | <i>Thuja occidentalis</i>      |                             | 1.4×10 <sup>-5</sup>              | 5.0×10 <sup>4</sup>  | 1.5×10 <sup>-5</sup>         | 281             | 120                  |
|                           | <i>Thuja occidentalis</i>      |                             | 3.5×10 <sup>-5</sup>              | 2.0×10 <sup>4</sup>  | 1.1×10 <sup>-5</sup>         | 281             | 120                  |
|                           | <i>Thuja occidentalis</i>      |                             | 2.4×10 <sup>-5</sup>              | 2.8×10 <sup>4</sup>  | 5.1×10 <sup>-6</sup>         | 281             | 120                  |
|                           | <i>Thuja occidentalis</i>      |                             | 2.2×10 <sup>-5</sup>              | 3.1×10 <sup>4</sup>  | 3.0×10 <sup>-6</sup>         | 281             | 120                  |
|                           | <i>Thuja occidentalis</i>      |                             | 1.9×10 <sup>-5</sup>              | 3.6×10 <sup>4</sup>  | 6.5×10 <sup>-6</sup>         | 281             | 120                  |
|                           | <i>Thuja occidentalis</i>      |                             | 4.9×10 <sup>-5</sup>              | 1.4×10 <sup>4</sup>  | 1.8×10 <sup>-5</sup>         | 281             | 120                  |
|                           | <i>Thuja occidentalis</i>      |                             | 4.5×10 <sup>-5</sup>              | 1.5×10 <sup>4</sup>  | 1.5×10 <sup>-5</sup>         | 281             | 120                  |
| <i>Thuja occidentalis</i> |                                | 4.2×10 <sup>-5</sup>        | 1.6×10 <sup>4</sup>               | 3.0×10 <sup>-5</sup> | 281                          | 120             |                      |

**Table 2. (cont).**

| Plant type | Species (or community)       | Individual plant mass (gDW) | Mortality rate (d <sup>-1</sup> ) | Half-life (d)       | Birthrate (d <sup>-1</sup> ) | Temperature (K) | Source<br>Plant data |
|------------|------------------------------|-----------------------------|-----------------------------------|---------------------|------------------------------|-----------------|----------------------|
| Trees      | <i>Thuja occidentalis</i>    |                             | 8.2x10 <sup>-7</sup>              | 8.5x10 <sup>5</sup> | 2.1x10 <sup>-5</sup>         | 281             | 120                  |
|            | <i>Thuja occidentalis</i>    |                             | 5.9x10 <sup>-6</sup>              | 1.2x10 <sup>5</sup> | 3.2x10 <sup>-5</sup>         | 281             | 120                  |
|            | <i>Thuja occidentalis</i>    |                             | 1.2x10 <sup>-5</sup>              | 5.8x10 <sup>4</sup> | 2.6x10 <sup>-5</sup>         | 281             | 120                  |
|            | <i>Thuja occidentalis</i>    |                             | 1.6x10 <sup>-5</sup>              | 4.2x10 <sup>4</sup> | 4.0x10 <sup>-6</sup>         | 281             | 120                  |
|            | <i>Tilia heterophylla</i>    | 2.0x10 <sup>6</sup>         | 2.7x10 <sup>-5</sup>              | 2.6x10 <sup>4</sup> |                              | 284             | 103                  |
|            | <i>Tilia americana</i>       |                             | 3.9x10 <sup>-5</sup>              | 1.8x10 <sup>4</sup> |                              | 282             | 104                  |
|            | <i>Trichilia tuberculata</i> | 4.1x10 <sup>5</sup>         | 4.7x10 <sup>-5</sup>              | 1.5x10 <sup>4</sup> |                              | 301             | 105                  |
|            | <i>Tsuga canadensis</i>      |                             | 3.1x10 <sup>-5</sup>              | 2.2x10 <sup>4</sup> |                              | 282             | 104                  |
|            | <i>Tsuga canadensis</i>      | 2.5x10 <sup>6</sup>         | 1.8x10 <sup>-5</sup>              | 4.0x10 <sup>4</sup> |                              | 284             | 105                  |
|            | <i>Tsuga heterophylla</i>    |                             | 1.7x10 <sup>-4</sup>              | 4.2x10 <sup>3</sup> |                              | 282             | 121                  |
|            | <i>Tsuga heterophylla</i>    |                             | 3.1x10 <sup>-4</sup>              | 2.3x10 <sup>3</sup> |                              | 282             | 121                  |
|            | <i>Tsuga heterophylla</i>    |                             | 1.2x10 <sup>-4</sup>              | 5.6x10 <sup>3</sup> |                              | 282             | 121                  |
|            | <i>Vaccinium meridionale</i> |                             | 4.4x10 <sup>-5</sup>              | 1.6x10 <sup>4</sup> | 4.4x10 <sup>-5</sup>         | 292             | 106                  |
|            | <i>Virola sebifera</i>       | 2.9x10 <sup>5</sup>         | 1.1x10 <sup>-4</sup>              | 6.6x10 <sup>3</sup> |                              | 301             | 105                  |
|            | <i>Virola surinamensis</i>   | 12 x10 <sup>5</sup>         | 5.8x10 <sup>-5</sup>              | 1.2x10 <sup>4</sup> |                              | 301             | 105                  |
