# Supplementary material
Source: PubMed Central journal article supplement (PMC2000409)
Supplement: pnas_0703476104_2.pdf [file pnas_0703476104_2.pdf]

**Table 3.** Data of tree diameter at breast height (d.b.h.) and individual mass (M) compiled to fit the regression equation  $M = 78 \text{ dbh}^{2.47}$  (slope 95 % c.i. 2.26 – 2.71,  $R^2 = 0.91$ ,  $n = 49$ ) used in the study.

| species                             | d.b.h<br>(cm)                             | M<br>(gDW)                                | Source |
|-------------------------------------|-------------------------------------------|-------------------------------------------|--------|
| <i>Acer macrophyllum</i>            | ( $7.6 \times 10^0$ - $3.5 \times 10^1$ ) | ( $1.2 \times 10^4$ - $6.9 \times 10^5$ ) | 122    |
| <i>Bellucia spp</i>                 | $2.7 \times 10^1$                         | $3.9 \times 10^5$                         | 123    |
| <i>Bombacopsis quinata</i>          | ( $1.4 \times 10^1$ - $4.6 \times 10^1$ ) | ( $3.0 \times 10^4$ - $9.8 \times 10^5$ ) | 124    |
| <i>Catanopsis chrysophylla</i>      | ( $5.8 \times 10^0$ - $3.6 \times 10^1$ ) | ( $4.9 \times 10^3$ - $5.8 \times 10^5$ ) | 122    |
| <i>Cecropia sciadophylla</i>        | ( $5.1 \times 10^0$ - $3.8 \times 10^1$ ) | ( $4.2 \times 10^3$ - $5.6 \times 10^5$ ) | 123    |
| <i>Croton matourensis</i>           | $2.5 \times 10^1$                         | $3.0 \times 10^5$                         | 123    |
| <i>Fagus sylvatica</i>              | $7.0 \times 10^0$                         | $3.8 \times 10^4$                         | 125    |
| <i>Fagus sylvatica</i>              | $1.5 \times 10^1$                         | $1.3 \times 10^5$                         | 125    |
| <i>Fagus sylvatica</i>              | $2.5 \times 10^1$                         | $3.3 \times 10^5$                         | 125    |
| <i>Fagus sylvatica</i>              | $3.5 \times 10^1$                         | $8.7 \times 10^5$                         | 125    |
| <i>Fagus sylvatica</i>              | $4.5 \times 10^1$                         | $1.5 \times 10^6$                         | 125    |
| <i>Fagus sylvatica</i>              | $5.5 \times 10^1$                         | $2.6 \times 10^6$                         | 125    |
| <i>Fitzroya cupressoides</i>        | ( $9.0 \times 10^0$ - $3.6 \times 10^1$ ) | ( $1.9 \times 10^4$ - $4.1 \times 10^5$ ) | 126    |
| <i>Goupia glabra</i>                | $1.2 \times 10^1$                         | $7.1 \times 10^4$                         | 123    |
| <i>Laetia procera</i>               | $2.5 \times 10^1$ )                       | $3.4 \times 10^5$                         | 123    |
| <i>Lariodendron tulipifera</i>      | $3.4 \times 10^1$                         | $5.9 \times 10^5$                         | 127    |
| <i>Larix eurolepis</i>              | ( $6.5 \times 10^0$ - $8.3 \times 10^0$ ) | ( $7.5 \times 10^3$ - $1.3 \times 10^4$ ) | 128    |
| <i>Metasequoia glyptostroboides</i> | ( $8.4 \times 10^0$ - $5.1 \times 10^1$ ) | ( $1.3 \times 10^4$ - $1.0 \times 10^6$ ) | 129    |
| <i>Picea avies</i>                  | $1.8 \times 10^1$                         | $6.2 \times 10^4$                         | 125    |
| <i>Picea avies</i>                  | $2.5 \times 10^1$                         | $2.5 \times 10^5$                         | 125    |
| <i>Picea avies</i>                  | $3.5 \times 10^1$                         | $5.3 \times 10^5$                         | 125    |
| <i>Picea avies</i>                  | $4.5 \times 10^1$                         | $8.0 \times 10^5$                         | 125    |
| <i>Picea avies</i>                  | $5.5 \times 10^1$                         | $1.5 \times 10^6$                         | 125    |
| <i>Picea avies</i>                  | $6.5 \times 10^1$                         | $2.0 \times 10^6$                         | 125    |
| <i>Picea avies</i>                  | $7.5 \times 10^1$                         | $3.0 \times 10^6$                         | 125    |
| <i>Picea mariana</i>                | ( $5.9 \times 10^0$ - $1.7 \times 10^1$ ) | ( $5.7 \times 10^3$ - $9.4 \times 10^4$ ) | 130    |
| <i>Picea mariana</i>                | ( $4.0 \times 10^0$ - $1.6 \times 10^1$ ) | ( $2.7 \times 10^3$ - $6.7 \times 10^4$ ) | 130    |
| <i>Pilgerodendron uviferum</i>      | ( $1.1 \times 10^1$ - $6.3 \times 10^1$ ) | ( $2.3 \times 10^4$ - $1.0 \times 10^6$ ) | 126    |
| <i>Pinus echinata</i>               | $3.4 \times 10^1$                         | $6.4 \times 10^5$                         | 127    |
| <i>Pinus lambertiana</i>            | ( $2.1 \times 10^1$ - $4.3 \times 10^1$ ) | ( $9.4 \times 10^4$ - $7.2 \times 10^5$ ) | 122    |
| <i>Pseudotsuga menziesii</i>        | ( $2.6 \times 10^1$ - $1.6 \times 10^2$ ) | ( $3.3 \times 10^5$ - $3.3 \times 10^7$ ) | 122    |
| <i>Quercus alba</i>                 | $4.5 \times 10^1$                         | $1.5 \times 10^6$                         | 127    |
| Tropical forest Borneo              | $7.6 \times 10^1$                         | $3.6 \times 10^5$                         | 131    |
| Tropical forest Borneo              | $9.4 \times 10^1$                         | $4.0 \times 10^5$                         | 131    |
| <i>Tsuga heterophylla</i>           | $4.9 \times 10^1$                         | $1.2 \times 10^6$                         | 122    |
| <i>Vismia cayennensis</i>           | $2.2 \times 10^1$                         | $2.3 \times 10^5$                         | 123    |
| <i>Vismia japurensis</i>            | $2.9 \times 10^1$                         | $4.7 \times 10^5$                         | 123    |
