# Supplementary material
Source: PubMed Central journal article supplement (PMC2000409)
Supplement: pnas_0703476104_3.pdf [file pnas_0703476104_3.pdf]

## References

- 1 Niklas K J (1994) *Plant Allometry The scaling of Form and Process* (Univ Chicago Press, Chicago, USA).
- 2 Reynolds C S (1984) *The Ecology of Freshwater Phytoplankton* (Cambridge Univ Press, Cambridge, UK).
- 3 Agustí S, Duarte CM (2000) *Mar Ecol Prog Ser* 206: 73-85 .
- 4 Brussaard CPD, Brookes R, Noordeloos AAM, Riegman R (1998) *J Exp Mar Biol Ecol* 227: 237-250.
- 5 Agustí S, Satta MP, Mura MP, Benavent E (1998) *Limnol Oceanogr* 43: 1836-1849 (1998).
- 6 Agustí S, Sánchez MC (2002) *Limnol Oceanogr* 47: 818-828.
- 7 Brussaard CPD, Marie D, Thyrrhaug R, Bratbak G (2001) *Aquat Microb Ecol* 26: 157-166.
- 8 Agustí S, et al (2001) *Deep-Sea Res II* 48: 2295-2321.
- 9 Aberg P (1992) *Ecology* 73: 1488-1501.
- 10 Aberg, PA (1992) *Ecology* 73: 1473-1487.
- 11 Schiel DR (1985) *J Ecol* 73: 199-217.
- 12 Vidondo B, Duarte CM (1998) *J Phycol* 34: 918-924.
- 13 Bégin C, Scheibling RE (2003) *Bot Mar* 46: 404-412.
- 14 Maxell BA, Miller KA (1996) *Bot Mar* 39: 479-489.
- 15 Pardi G, Piazzoli L, Cinelli F (2000) *Bot Mar* 43: 81-86.
- 16 Dayton PK, Tegner MJ, Edwards PB, Riser KL (1999) *Ecol Monogr* 69: 219-250.
- 17 Ang PO Jr (1991) *Mar Ecol Prog Ser* 78: 173-187.
- 18 Blanchette C A (1997) *Ecology* 78: 1563-1578.
- 19 Chapman ARO (1986) *J Exp Mar Biol Ecol* 97: 113-122.
- 20 Brady-Campbell M M, Campbell D B , Harlin M M (1984) *Mar Ecol Prog Ser* 18: 79-88.
- 21 Chapman A R O , Goudey C L (1983) *Can J Bot* 61: 319-323.
- 22 Faes V A , Viejo R M (2003) *J Phycol* 39: 1038-1049.
- 23 Coyer J A , Zaugg-Haglund C (1982) *Phycologia* 21: 399-407.

- 24 Gunnill F C (1980) *Mar Biol* 59: 169-179.
- 25 Kendrick G A , Walker D I (1994)*Phycology* 30: 200-208.
- 26 Riis T , Sand-Jensen K (1997) *J Ecol* 85: 359-372.
- 27 Hietz P (1997) *J Ecol* 85: 767-775.
- 28 Marbà N, Walker D I (1999) *Mar Ecol Prog Ser* 184: 105-118.
- 29 Cunha AH , Duarte C M (2005) *Mar Biol* 146: 841-847.
- 30 Pérez M, Duarte C M, Romero J, Sand-Jensen K , Alcoverro T (1994) *Aquat Bot* 47: 249-264.
- 31 Reyes J (1993) *Estudio de las praderas marinas de Cymodocea nodosa (Cymodoceaceae, Magnoliophyta) y su comunidad de epífitos, en El Médano (Tenerife, Islas Canarias)* (PhD Thesis, University of La Laguna, La Laguna, Spain).
- 32 Vermaat J, Agawin N, Duarte DM, Fortes MD, Marbà N , Uri J (1995) *Mar Ecol Prog Ser* 124: 215-225 .
- 33 Duarte, CM, Uri JS, Agawin NSR, Fortes MD, Vermaat JE, Marbà N (1997) *Bot Mar* 40: 497-500.
- 34 Gallegos M, Merino M, Rodríguez A, Marbà N, Duarte CM (1994) *Mar Ecol Prog Ser* 109: 99-104.
- 35 Marbà N, Cebrián J, Enríquez S , Duarte CM (1996) *Mar Ecol Prog Ser* 133: 203-215.
- 36 Marbà N, et al (2005) *Estuaries* 28: 51-60.
- 37 Holmer M, Duarte C M , Marbà N (2003) *Biogeochemistry* 66: 223-239.
- 38 Marbà N, Duarte C M, Holmer M, Martínez R, Basterretxea G, Orfila A, Jordi A, Tintoré J (2002) *Environm Conserv* 29: 509-518.
- 39 Balestri E, Piazzzi L , Cinelli F (1998) *J Exp Mar Biol Ecol* 228: 209-225.
- 40 Piazzzi L, Acunto S , Cinelli F (1999) *Aquat Bot* 63: 103-112.
- 41 Kenworthy W J , Schawarzschild A (1998)*Mar Ecol Prog Ser* 173: 25-37.
- 42 Duarte C M, Hemminga MA, Marbà N (1996) *Aquat Bot* 55: 1-11.
- 43 Kamermans P, Hemminga MA, Marbà N, Mateo M A, Mtolera M , Stapel J (2001) *Aquat Bot* 70: 243-258.
- 44 Gallegos M, Merino M, Marbà N , Duarte CM (1993) *Mar Ecol Prog Ser* 95: 185-192.
- 45 Marbà N, Gallegos M, Merino M , Duarte CM (1994) *Aquat Bot* 47: 1-11.

- 46 Olesen B , Sand-Jensen K (1994) *J Ecol* 82: 379-390.
- 47 Laugier T, Rigollet V , Casabianca M L d (1999) *Aquat Bot* 63: 51-69.
- 48 Levin D A (1973) *Evolution* 27: 532-535.
- 49 Treshow M , Harper K (1974) *Oikos* 25: 93-96.
- 50 West N E, Rea K H , Harniss R O (1979) *Ecology* 62: 376-388.
- 51 Nault A , Gagnon D (1993) *J Ecol* 81: 101-119 .
- 52 Abul-Fatih HA , Bazzaz FA (1980) *New Phytol* 84: 107-111.
- 53 Antonovics J (1972) *J Ecol* 60: 351-365.
- 54 Bastrenta B (1991) *J Ecol* 79: 275-284.
- 55 Bierzychudek P (1982) *Ecol Monogr* 52: 335-351.
- 56 Canfield RH (1957) *J Range Manag* 10: 199-203.
- 57 Taylor A H , Zisheng Q (1993) *Environm Conserv* 20: 76-79.
- 58 Sarukhán J , Harper J L (1973) *J Ecol* 61: 675-715.
- 59 Kroon H d , Kwant R (1991) *Oecologia* 86: 298-304.
- 60 Wesseling R A, Klinkhamer PGL, Jong T J D , Boorman L A (1997) *Ecology* 78: 2118-2132.
- 61 Ridder F D , Dhondt A A (1992) *Ecography* 15: 129-143.
- 62 Watson M A , Cook G S (1987) *J Ecol* 75: 439-457.
- 63 Fetcher N , Shaver GR (1983) *J Ecol* 71: 131-147.
- 64 Taylor A H , Zisheng Q (1987) *J App Ecol* 24: 419-433.
- 65 Bishop GF , , Davy AJ (1984) *J Ecol* 72: 273-284.
- 66 Bishop GF, Davy AJ , Jefferies RL (1978) *J Ecol* 66: 615-629.
- 67 Schmitt J, Eccleston J , Ehrhardt DW (1987) *J Ecol* 75: 651-665.
- 68 Bell G, Lechowicz M J, Schoen D J (1991) *J Ecol* 79: 697-713.
- 69 Sutherland WJ , Walton D (1990) *Funct Ecol* 4: 655-659.
- 70 Hossaert-Mckey M , Jarry M (1992) *J Ecol* 80: 555-565.
- 71 Silva J F, Kana T M , Solbrig O T (1982) *Oecologia* 52: 181-186.
- 72 Hutchings MJ , Barkham JP (1976) *J Ecol* 64: 723-743.

- 73 Lewis W H , Zenger V E (1982) *Am J Bot* 69: 1483-1490.
- 74 Waite S (1984) *J Ecol* 70: 809-826.
- 75 Hawthorn W R, Cavers PB (1976) *J Ecol* 64: 511-527.
- 76 Jerling L , Liljelund LE (1984) *Hol Ecol* 7: 280-288.
- 77 Shimono Y , Kudo G (2003) *Ann Bot* 91: 21-29.
- 78 Doust L L (1981) *J Ecol* 69: 743-755.
- 79 Jefferies RL, Davy AJ , Rudmik T (1981) *J Ecol* 69: 17-31.
- 80 Bradbury K I (1981) *Oecologia* 48: 271-276.
- 81 Reidenbaugh T G (1983) *Am J Bot* 70: 47-52.
- 82 Telenius A (1993) *J Ecol* 81: 61-73.
- 83 Ford H (1981) *Biol J Linn Soc* 15: 1-11.
- 84 Turkington R, Cahn MA, Vardy A , Harper JL (1979) *J Ecol* 67: 231-243.
- 85 Dickerman J A, Wetzel R G (1985) *J Ecol* 73: 535-552.
- 86 Hara T , Srutek M (1995) *Ann Bot* 76: 235-243.
- 87 Newell S J, Solbrig O T , Kincaid D T (1981) *J Ecol* 69: 997-1016.
- 88 Flores J, Briones O, Flores A , Sánchez-Colón S (2004) *J Arid Environ* 58: 1-18.
- 89 Pierson E A, Turner R M (1998) *Ecology* 79: 2676-2693.
- 90 Peñalosa J (1983) *Ann Bot* 52: 737-754.
- 91 Whitney G G A (1986) *Can J Bot* 64: 2916-2921.
- 92 Pelton J (1953) *Ecol Monogr* 23: 17-39.
- 93 Thampanya U, Vermaat J E , Duarte C M (2002) *Mar Ecol Prog Ser* 237: 111-120.
- 94 Bamroongrugsas N , Yuanlaie P (1995) *Mangrove afforestation on newly formed mudflats of the Patani Bay, Southern Thailand Ecology and management of mangrove restoration and regeneration in East and Southeast Asia ecotone IV.*
- 95 Smith T J III (1987) *Est Coast Shelf Sci* 25: 43-51.
- 96 Thampanya U, Vermaat J E , Terrados J (2002) *Aquat Bot* 74: 315-325.
- 97 Terrados J, et al (1997) *Est Coast Shelf Sci* 45: 697-701.
- 98 Komiyama A et al (1996) *For Ecol Manag* 81: 243-248.

- 99 Shea K L (1985) *Am J Bot* 7: 1823-1833.
- 100 Crisp MD , Lange RT (1976) *Oikos* 27: 86-92.
- 101 Grice AC, Westoby M , Torpy C (1994) *Aus J Ecol* 19: 10-16.
- 102 Bartlett RM, Reader RJ, Larson DW (1991) *J Ecol* 79: 183-197.
- 103 Runkle J R (1998) *Ecology* 79: 1768-1780.
- 104 Volk T A , Fahey T J (1994) *Bull Torr Bot Club* 121: 140-147.
- 105 Milton K, Laca E A, Demment M W (1994) *J Ecol* 82: 79-87.
- 106 Bellingham PJ, Tanner EVJ (1995) *Ecology* 76: 2562-2580.
- 107 Aiba SI , Kohyama T (1996) *J Ecol* 84: 207-218.
- 108 Aiba SI , Kohyama T (1997) *J Ecol* 85: 611-624.
- 109 Alvarez-Buylla E R, Martinez-Ramos M (1992) *J Ecol* 80: 275-290.
- 110 Donovan L A, McLeod K W, Sherrod J KC, Stumpff, N J (1988) *Am J Bot* 75: 1181-1190.
- 111 Duncan R P , Stewart G H (1991) *Can J For Res* 21: 1703-1710.
- 112 Condit R, Hubbell S P , Foster R B (1994) *Ecology* 75: 671-680.
- 113 Ashton P S , Hall P (1992) *J Ecol* 80: 459-481.
- 114 Veenendaal EM, Swaine MD, Agyeman VK, Blay D, Abebrese IK, Mullins CE (1995) *J Ecol* 83: 83-90.
- 115 Davies, S J (1998) *Ecology* 79: 2292-2308.
- 116 Légère A , Payette S (1981) *Artic Alp Res* 13: 261-276.
- 117 Stoll P, Weiner J , Schmid B (1994) *Ecology* 75: 660-670.
- 118 Krasny M E , Johson E A (1992) *Can J For Res* 22: 1424-1429.
- 119 Pedersen B S (1998) *Ecology* 79: 79-93.
- 120 Kelly PE , Larson DW (1997) *J Ecol* 85: 467-478.
- 121 Christy E J , NMack R (1984) *J Ecol* 72: 75-91.
- 122 Grier CC , Logan R S (1977) *Ecol Monogr* 47: 373-400.
- 123 Nelson BW, Mesquita R, Pereira J L G, Garcia Aquino de Souza S, Teixeira Batista G , Bovino Couto L (1999) *For Ecol Manag* 117: 149-167.

- 124 Pérez Cordero L D, Kanninen M (2002) *For Ecol Manag* 165: 1-9.
- 125 Bolte A, Rahmann T, Kuhr M, Pogoda P, Murach D , Gadow K V (2004) *Plant Soil* 264: 1-11.
- 126 Vann D R, Palmiotto P A , Strimbeck G R (1998) *For Ecol Manag* 106: 55-71.
- 127 Wittaker R H, Cohen N , Olson J S (1963) *Ecology* 44: 806-810.
- 128 Zavitlowski J , Strong T F (1984) *North Central Forest Experiment Station, Research Note NC-321*.
- 129 Williams C J, LePage B A, Vann D R, Tange T, Ikeda H, Ando M, Kasukabe T, Tsuzuki H , Sweda T (2003) *For Ecol Manag* 173: 1-15.
- 130 Bond-Lamberty B, Wang C , Gower ST (2002) *Can J For Res* 32: 1441-1450.
- 131 Kanehiro K, Aiba S I, Takyu M, Majalap N , Wagai R (2004) *Ecosystems* 7: 259-274.
